# Supplementary material for: The fire and fodder reversal phenomenon: vertebrate herbivore activity in burned and unburned Tasmanian ecosystems
Source: Preprints.org preprint supplement (doi:10.20944/preprints202205.0312.v1), 2022-05-24
Supplement: Supplementary file 3 [file supplementary]

## Sheet: Wombat
Number	Location	TASVEG	Herbivore	Scat	Fire	Elevation	Grass	Herb	Bare	Rock	Fodder	Slope	CWD	Canopy	Sedge	Shrub	Fern	Moss	Litter	SoilM	SoilC	SoilT	MinJuly	MARfeb	Maxjan	Scatclass	Scatclass2
301	Sunny Hills 1	DE	Wombat	0	B	171	0	1	2	0	1	3	5	55	0	0	7	2	95	6.8	0.04	13.5	3.6	56.1	21.7	Absence	0
302	Sunny Hills 1	DE	Wombat	0	B	168	0	2	35	0	2	3	0	55	0	0	35	0	65	7	0.08	13.8	3.6	56.1	21.7	Absence	0
303	Sunny Hills 1	DE	Wombat	0	B	171	0	1	75	2	1	4	3	30	0	0	10	5	20	4.3	0.02	14	3.6	56.1	21.7	Absence	0
304	Sunny Hills 1	DE	Wombat	0	B	178	0	1	30	2	1	4	0	55	2	0	6	0	70	9.1	0.02	14.2	3.6	56.1	21.7	Absence	0
305	Sunny Hills 1	DE	Wombat	0	B	179	4	2	40	1	6	4	15	40	5	0	0	0	40	14.2	0	14.3	3.6	56.1	21.7	Absence	0
306	Sunny Hills 1	DE	Wombat	0	B	177	0	2	30	35	2	4	0	20	15	0	4	20	30	6.5	0.02	14.3	3.6	56.1	21.7	Absence	0
307	Sunny Hills 2	DE	Wombat	0	U	171	0	2	10	0	2	2	20	30	2	0	2	4	70	9.6	0.1	14.5	3.6	56.4	21.7	Absence	0
308	Sunny Hills 2	DE	Wombat	0	U	175	0	0	40	0	0	3	0	70	2	0	3	0	60	4.8	0.01	14.3	3.6	56.4	21.7	Absence	0
309	Sunny Hills 2	DE	Wombat	0	U	174	0	0	0	0	0	3	0	10	2	0	70	10	50	6.2	0	14.4	3.6	56.4	21.7	Absence	0
310	Sunny Hills 2	DE	Wombat	0	U	170	0	0	0	0	0	3	0	70	3	0	30	0	70	11	0	15.1	3.6	56.4	21.7	Absence	0
311	Sunny Hills 2	DE	Wombat	0	U	175	0	0	8	0	0	3	0	60	4	0	5	0	90	6	0	15.9	3.6	56.4	21.7	Absence	0
312	Sunny Hills 2	DE	Wombat	0	U	174	0	3	0	0	3	2	0	10	3	0	5	35	60	10	0	16.3	3.6	56.4	21.7	Absence	0
313	Five Rivers 2	DE	Wombat	0	B	814	5	80	8	0	85	2	0	0	0	16	0	10	2	23.2	0.05	15.8	-0.2	49.9	19.3	Absence	0
314	Five Rivers 2	DE	Wombat	0	B	816	35	10	3	50	45	1	0	0	0	0	0	2	0	28.9	0.05	17.2	-0.2	49.9	19.3	Absence	0
315	Five Rivers 2	DE	Wombat	0	B	821	10	65	12	5	75	1	0	0	0	0	0	3	5	5	0.02	17.3	-0.2	49.9	19.3	Absence	0
316	Five Rivers 2	DE	Wombat	0	B	818	3	20	30	20	23	2	0	0	0	0	0	8	20	11.2	0	15.9	-0.2	49.9	19.3	Absence	0
317	Five Rivers 2	DE	Wombat	0	B	827	10	30	35	20	40	2	0	0	0	0	0	5	2	14.8	0.04	15.6	-0.2	49.9	19.3	Absence	0
318	Five Rivers 2	DE	Wombat	0	B	828	5	10	10	60	15	2	0	10	0	0	0	0	40	16.7	0	14.2	-0.2	49.9	19.3	Absence	0
319	Five Rivers 1	DE	Wombat	0	U	864	15	12	1	2	27	1	0	50	2	0	0	2	70	8.3	0.02	15.8	-0.2	59.5	19	Absence	0
320	Five Rivers 1	DE	Wombat	0	U	856	30	15	1	0	45	1	0	30	0	25	0	2	50	6	0	15.6	-0.2	59.5	19	Absence	0
321	Five Rivers 1	DE	Wombat	0	U	858	6	3	3	2	9	1	0	30	6	50	0	10	40	4.9	0	15.5	-0.2	59.5	19	Absence	0
322	Five Rivers 1	DE	Wombat	2	U	853	5	5	2	0	10	1	0	0	0	50	0	30	30	12.5	0.02	14.7	-0.2	59.5	19	Presence	1
323	Five Rivers 1	DE	Wombat	0	U	853	55	25	3	2	80	1	10	0	0	20	0	5	10	6.4	0.07	14.4	-0.2	59.5	19	Absence	0
324	Five Rivers 1	DE	Wombat	0	U	850	90	6	0	0	96	2	0	40	0	0	0	1	30	6.6	0.05	13.4	-0.2	59.5	19	Absence	0
325	Euc Home 1	DE	Wombat	0	B	643	5	6	1	17	11	3	3	45	0	18	0	13	60	8.1	0	13.9	0.7	48.7	20	Absence	0
326	Euc Home 1	DE	Wombat	0	B	646	2	3	0	2	5	2	4	55	5	2	0	7	96	7.1	0.07	12.9	0.7	48.7	20	Absence	0
327	Euc Home 1	DE	Wombat	0	B	643	1	1	0	1	2	2	0	55	0	86	0	1	55	8.2	0.12	12.2	0.7	48.7	20	Absence	0
328	Euc Home 1	DE	Wombat	0	B	644	1	2	0	0	3	2	4	20	5	14	0	5	98	15.4	0.08	11.7	0.7	48.7	20	Absence	0
329	Euc Home 1	DE	Wombat	0	B	643	2	2	1	82	4	2	0	55	0	3	0	80	17	5.2	0.05	10.9	0.7	48.7	20	Absence	0
330	Euc Home 1	DE	Wombat	1	B	647	6	1	2	7	7	2	2	55	0	3	0	22	86	10.3	0.07	10.7	0.7	48.7	20	Presence	1
331	Euc Home 2	DE	Wombat	1	U	651	65	4	0	0	69	2	0	50	0	4	0	5	30	12.9	0.04	7	0.7	49.6	19.8	Presence	1
332	Euc Home 2	DE	Wombat	0	U	652	86	2	0	0	88	2	0	0	0	9	0	7	13	7.7	0.03	7.1	0.7	49.6	19.8	Absence	0
333	Euc Home 2	DE	Wombat	0	U	644	4	0	0	0	4	2	0	60	0	100	0	0	30	16.9	0.1	7.1	0.7	49.6	19.8	Absence	0
334	Euc Home 2	DE	Wombat	0	U	644	94	4	0	0	98	2	0	60	0	0	0	2	20	16.4	0.04	7.2	0.7	49.6	19.8	Absence	0
335	Euc Home 2	DE	Wombat	3	U	650	4	0	0	0	4	2	0	55	0	100	0	0	6	7.9	0.03	8.2	0.7	49.6	19.8	Presence	1
336	Euc Home 2	DE	Wombat	0	U	649	22	2	0	0	24	2	8	50	0	5	0	1	82	16	0.05	8.3	0.7	49.6	19.8	Absence	0
337	Fingal 1	DE	Wombat	0	B	454	60	11	15	5	71	2	1	0	5	0	0	1	2	39.4	0.03	11.5	2.2	55.5	22.2	Absence	0
338	Fingal 1	DE	Wombat	0	B	456	15	6	50	25	21	2	0	0	2	0	0	2	2	26	0.12	11.6	2.2	55.5	22.2	Absence	0
339	Fingal 1	DE	Wombat	0	B	460	0	6	10	50	6	3	0	0	40	0	0	4	1	23.5	0.09	11.9	2.2	55.5	22.2	Absence	0
340	Fingal 1	DE	Wombat	0	B	463	0	1	3	20	1	2	4	30	3	2	0	1	85	16.5	0.05	12.5	2.2	55.5	22.2	Absence	0
341	Fingal 1	DE	Wombat	0	B	457	4	3	6	30	7	2	2	50	0	2	0	3	65	17.6	0.07	13	2.2	55.5	22.2	Absence	0
342	Fingal 1	DE	Wombat	0	B	456	65	3	4	4	68	3	10	40	12	0	0	1	5	31.7	0.13	13.2	2.2	55.5	22.2	Absence	0
343	Fingal 2	DE	Wombat	0	U	432	80	5	0	0	85	2	6	10	10	0	0	2	0	15.1	0	10.8	2.2	49.5	22.3	Absence	0
344	Fingal 2	DE	Wombat	0	U	433	3	2	0	0	5	2	0	10	85	0	0	6	6	24.2	0.05	10.9	2.2	49.5	22.3	Absence	0
345	Fingal 2	DE	Wombat	0	U	430	65	4	2	0	69	2	4	40	12	0	0	4	10	14.1	0	11.2	2.2	49.5	22.3	Absence	0
346	Fingal 2	DE	Wombat	0	U	432	81	4	0	0	85	2	6	55	8	0	0	1	50	6.5	0.08	11.3	2.2	49.5	22.3	Absence	0
347	Fingal 2	DE	Wombat	0	U	431	9	0	0	0	9	2	80	45	2	0	0	0	90	19.1	0.04	11.5	2.2	49.5	22.3	Absence	0
348	Fingal 2	DE	Wombat	0	U	434	0	3	0	1	3	2	4	30	95	0	0	3	6	19.6	0.05	11.5	2.2	49.5	22.3	Absence	0
349	Five Rivers 3	H	Wombat	0	B	815	35	2	30	6	37	1	2	50	0	0	0	2	38	27.2	0.05	12.7	-0.4	50.7	19.4	Absence	0
350	Five Rivers 3	H	Wombat	0	B	815	40	30	0	25	70	1	0	10	0	0	0	2	25	23.5	0.07	12.8	-0.4	50.7	19.4	Absence	0
351	Five Rivers 3	H	Wombat	0	B	815	8	80	0	0	88	1	0	0	0	6	0	10	4	9.7	0.06	13.7	-0.4	50.7	19.4	Absence	0
352	Five Rivers 3	H	Wombat	0	B	814	4	70	0	0	74	1	0	0	0	0	0	12	8	27.7	0.02	13.6	-0.4	50.7	19.4	Absence	0
353	Five Rivers 3	H	Wombat	0	B	812	8	70	0	0	78	1	0	0	0	0	0	20	2	16.8	0.05	13.6	-0.4	50.7	19.4	Absence	0
354	Five Rivers 3	H	Wombat	3	B	812	5	80	0	0	85	1	0	0	0	0	0	15	3	13.2	0	13.7	-0.4	50.7	19.4	Presence	1
355	Five Rivers 4	H	Wombat	0	U	815	80	3	0	0	83	1	0	0	0	0	0	17	0	8.7	0	13	-0.4	50.8	19.5	Absence	0
356	Five Rivers 4	H	Wombat	0	U	817	92	8	0	0	100	1	0	0	0	0	0	0	0	7.1	0.07	13	-0.4	50.8	19.5	Absence	0
357	Five Rivers 4	H	Wombat	0	U	817	17	20	1	2	37	1	0	0	0	60	0	1	0	8.3	0.08	14.2	-0.4	50.8	19.5	Absence	0
358	Five Rivers 4	H	Wombat	0	U	817	6	6	0	0	12	1	0	0	0	88	0	0	0	11.2	0.03	14.2	-0.4	50.8	19.5	Absence	0
359	Five Rivers 4	H	Wombat	0	U	818	40	5	0	45	45	1	0	40	0	0	0	10	20	8.9	0.02	14.2	-0.4	50.8	19.5	Absence	0
360	Five Rivers 4	H	Wombat	0	U	820	55	15	1	0	70	2	0	50	3	8	0	3	20	5.3	0.01	14.2	-0.4	50.8	19.5	Absence	0
361	Little Pine Lagoon 1	H	Wombat	0	B	1014	62	3	17	0	65	1	0	0	0	0	0	18	0	32.9	0.07	11.7	-1.3	46.2	18.7	Absence	0
362	Little Pine Lagoon 1	H	Wombat	0	B	1011	14	8	31	1	22	1	0	0	0	2	0	60	0	12.1	0	12.2	-1.3	46.2	18.7	Absence	0
363	Little Pine Lagoon 1	H	Wombat	0	B	1011	15	15	20	3	30	1	4	0	2	0	0	41	0	19.5	0.04	12.7	-1.3	46.2	18.7	Absence	0
364	Little Pine Lagoon 1	H	Wombat	0	B	1012	3	22	18	6	25	1	7	0	0	0	0	60	0	20.7	0.05	12.5	-1.3	46.2	18.7	Absence	0
365	Little Pine Lagoon 1	H	Wombat	0	B	1013	26	4	20	0	30	1	2	0	0	0	0	44	0	24.3	0.04	12.6	-1.3	46.2	18.7	Absence	0
366	Little Pine Lagoon 1	H	Wombat	0	B	1011	8	7	25	0	15	1	4	0	0	0	0	56	0	20.6	0	12	-1.3	46.2	18.7	Absence	0
367	Little Pine Lagoon 2	H	Wombat	0	U	1014	9	2	0	0	11	1	0	0	0	83	0	6	0	30.4	0.04	13.7	-1.3	46.3	18.7	Absence	0
368	Little Pine Lagoon 2	H	Wombat	0	U	1015	36	21	8	0	57	1	0	0	0	26	0	9	0	29.5	0.05	13.2	-1.3	46.3	18.7	Absence	0
369	Little Pine Lagoon 2	H	Wombat	0	U	1014	16	2	0	0	18	1	0	0	0	79	0	3	0	19.2	0.06	13.2	-1.3	46.3	18.7	Absence	0
370	Little Pine Lagoon 2	H	Wombat	5	U	1016	1	1	0	0	2	1	0	0	0	97	0	1	0	17.4	0.05	14.3	-1.3	46.3	18.7	Presence	2
371	Little Pine Lagoon 2	H	Wombat	3	U	1020	0	2	0	0	2	1	0	0	0	90	0	6	2	21.8	0	15.2	-1.3	46.3	18.7	Presence	1
372	Little Pine Lagoon 2	H	Wombat	7	U	1021	0	0	0	0	0	1	0	0	0	100	0	0	0	11.3	0.04	15.2	-1.3	46.3	18.7	Presence	2
373	Lake Augusta 1	H	Wombat	0	B	1152	0	13	5	0	13	2	8	0	0	0	0	63	0	22.9	0.02	10.4	-1.7	53.4	18.3	Absence	0
374	Lake Augusta 1	H	Wombat	0	B	1140	5	15	26	0	20	1	7	0	0	0	0	46	1	44.6	0.06	9.1	-1.7	53.4	18.3	Absence	0
375	Lake Augusta 1	H	Wombat	0	B	1149	25	11	4	0	36	1	0	0	0	4	0	55	0	32.2	0.02	9.1	-1.7	53.4	18.3	Absence	0
376	Lake Augusta 1	H	Wombat	0	B	1148	46	48	0	0	94	1	0	0	0	6	0	0	0	10.7	0.05	6.4	-1.7	53.4	18.3	Absence	0
377	Lake Augusta 1	H	Wombat	0	B	1147	16	7	0	0	23	1	48	0	0	0	0	27	0	44.7	0.08	9.5	-1.7	53.4	18.3	Absence	0
378	Lake Augusta 1	H	Wombat	0	B	1149	4	4	7	0	8	1	6	0	0	0	0	79	0	48.6	0.04	9.5	-1.7	53.4	18.3	Absence	0
379	Lake Augusta 2	H	Wombat	0	U	1167	29	0	2	20	29	2	0	0	0	10	0	39	0	22.8	0.06	11.5	-1.7	53	18.4	Absence	0
380	Lake Augusta 2	H	Wombat	0	U	1163	39	0	3	57	39	2	0	0	0	1	0	0	0	24.6	0.06	12	-1.7	53	18.4	Absence	0
381	Lake Augusta 2	H	Wombat	0	U	1160	38	0	14	47	38	1	0	0	0	0	0	1	0	15.8	0.02	12.1	-1.7	53	18.4	Absence	0
382	Lake Augusta 2	H	Wombat	0	U	1161	0	0	3	97	0	1	0	0	0	0	0	0	0	5.7	0.02	11.4	-1.7	53	18.4	Absence	0
383	Lake Augusta 2	H	Wombat	0	U	1162	5	0	23	71	5	2	0	0	0	0	0	1	0	15.1	0.02	11.4	-1.7	53	18.4	Absence	0
384	Lake Augusta 2	H	Wombat	0	U	1164	0	8	25	12	8	2	0	0	0	52	0	3	0	24.2	0.06	11.3	-1.7	53	18.4	Absence	0
385	Liaweenee 1	H	Wombat	0	B	1061	57	17	21	3	74	1	0	0	0	0	0	2	0	18.2	0.03	10.8	-1.5	47.1	18.5	Absence	0
386	Liaweenee 1	H	Wombat	0	B	1065	5	6	87	15	11	1	0	0	0	0	0	2	0	15.7	0.02	8.8	-1.5	47.1	18.5	Absence	0
387	Liaweenee 1	H	Wombat	0	B	1066	74	9	16	8	83	1	2	0	0	0	0	5	0	11	0.02	8.5	-1.5	47.1	18.5	Absence	0
388	Liaweenee 1	H	Wombat	0	B	1065	19	4	65	18	23	1	0	0	0	1	0	0	0	22.2	0.06	7.6	-1.5	47.1	18.5	Absence	0
389	Liaweenee 1	H	Wombat	0	B	1068	4	12	55	45	16	1	0	0	0	0	0	3	0	18.1	0.04	6.9	-1.5	47.1	18.5	Absence	0
390	Liaweenee 1	H	Wombat	0	B	1067	0	3	90	90	3	1	0	0	0	0	0	0	0	26	0.05	6.3	-1.5	47.1	18.5	Absence	0
391	Liaweenee 2	H	Wombat	0	U	1064	14	5	0	0	19	1	0	0	0	75	0	6	0	14.2	0.05	5.7	-1.5	46.3	18.6	Absence	0
392	Liaweenee 2	H	Wombat	0	U	1066	62	4	8	5	66	1	0	0	0	0	0	21	0	25	0.06	5.6	-1.5	46.3	18.6	Absence	0
393	Liaweenee 2	H	Wombat	0	U	1065	7	2	88	78	9	1	0	0	0	0	0	2	2	31.5	0.05	5.3	-1.5	46.3	18.6	Absence	0
394	Liaweenee 2	H	Wombat	0	U	1065	27	6	0	0	33	1	0	0	0	0	0	73	0	17.7	0.06	5.3	-1.5	46.3	18.6	Absence	0
395	Liaweenee 2	H	Wombat	0	U	1065	4	6	0	0	10	1	0	0	0	52	0	48	0	12.3	0.06	5	-1.5	46.3	18.6	Absence	0
396	Liaweenee 2	H	Wombat	0	U	1064	24	5	63	63	29	1	0	0	0	0	0	5	3	22.2	0.04	4.8	-1.5	46.3	18.6	Absence	0
397	Lake Augusta 3	H	Wombat	0	B	1149	2	1	1	0	3	1	0	0	0	0	0	97	0	53.2	0.04	15.9	-1.7	53.7	18.3	Absence	0
398	Lake Augusta 3	H	Wombat	0	B	1149	5	2	1	0	7	1	0	0	0	0	0	92	0	58.9	0.08	16.9	-1.7	53.7	18.3	Absence	0
399	Lake Augusta 3	H	Wombat	7	B	1149	17	38	21	0	55	1	2	0	0	0	0	22	0	65.8	0.05	17	-1.7	53.7	18.3	Presence	2
400	Lake Augusta 3	H	Wombat	0	B	1148	6	58	9	0	64	1	8	0	0	0	0	22	0	70.1	0.18	19.9	-1.7	53.7	18.3	Absence	0
401	Lake Augusta 3	H	Wombat	0	B	1147	7	54	4	0	61	1	11	0	0	0	0	24	0	67.1	0.08	18.8	-1.7	53.7	18.3	Absence	0
402	Lake Augusta 3	H	Wombat	0	B	1147	28	90	0	0	118	1	0	0	0	6	0	22	0	56.6	0.03	18.2	-1.7	53.7	18.3	Absence	0
403	Lake Augusta 4	H	Wombat	0	U	1147	91	0	0	0	91	1	0	0	0	9	0	15	0	49.9	0.02	17.1	-1.7	53.8	18.3	Absence	0
404	Lake Augusta 4	H	Wombat	15	U	1150	12	18	6	0	30	1	0	0	40	18	0	16	0	68.9	0.06	17.5	-1.7	53.8	18.3	Presence	2
405	Lake Augusta 4	H	Wombat	0	U	1150	4	16	0	0	20	1	0	0	18	64	0	1	0	68.9	0.07	16.6	-1.7	53.8	18.3	Absence	0
406	Lake Augusta 4	H	Wombat	0	U	1150	5	8	0	0	13	1	0	0	2	85	0	0	0	19.9	0.02	16.3	-1.7	53.8	18.3	Absence	0
407	Lake Augusta 4	H	Wombat	0	U	1150	7	8	9	0	15	1	0	0	0	75	0	1	0	64.2	0.04	16.3	-1.7	53.8	18.3	Absence	0
408	Lake Augusta 4	H	Wombat	0	U	1150	7	8	9	0	15	1	0	0	0	75	0	1	0	64.2	0.04	16.3	-1.7	53.8	18.3	Absence	0
409	Little Pine Moorland 1	MSR	Wombat	0	B	1015	9	79	10	5	88	2	6	0	0	3	0	0	0	12.7	0.04	17.4	-1.5	49	18.6	Absence	0
410	Little Pine Moorland 1	MSR	Wombat	0	B	1015	56	50	2	0	106	2	0	0	0	0	0	0	0	16	0	17.1	-1.5	49	18.6	Absence	0
411	Little Pine Moorland 1	MSR	Wombat	1	B	1014	57	31	12	0	88	2	0	0	0	0	0	0	0	21.5	0.03	17.3	-1.5	49	18.6	Presence	1
412	Little Pine Moorland 1	MSR	Wombat	0	B	1013	56	29	7	0	85	2	4	0	0	0	0	2	0	19.4	0.04	14.4	-1.5	49	18.6	Absence	0
413	Little Pine Moorland 1	MSR	Wombat	0	B	1011	68	28	4	0	96	2	0	0	0	0	0	0	0	25.6	0.09	13.7	-1.5	49	18.6	Absence	0
414	Little Pine Moorland 1	MSR	Wombat	0	B	1012	21	33	46	0	54	1	0	0	0	0	0	0	0	12.4	0.04	13.1	-1.5	49	18.6	Absence	0
415	Little Pine Moorland 2	MSR	Wombat	0	U	1009	40	0	0	0	40	2	0	0	60	0	0	0	0	52	0.09	11.1	-1.5	50.4	18.5	Absence	0
416	Little Pine Moorland 2	MSR	Wombat	0	U	1009	70	0	0	0	70	2	0	0	30	0	0	0	0	43.6	0.1	10.9	-1.5	50.4	18.5	Absence	0
417	Little Pine Moorland 2	MSR	Wombat	0	U	1005	85	3	0	0	88	2	0	0	15	0	0	0	0	32.9	0.07	10.7	-1.5	50.4	18.5	Absence	0
418	Little Pine Moorland 2	MSR	Wombat	0	U	1006	90	0	0	0	90	2	0	0	10	0	0	0	0	29	0.12	10.5	-1.5	50.4	18.5	Absence	0
419	Little Pine Moorland 2	MSR	Wombat	0	U	1007	65	0	0	0	65	2	0	0	45	0	0	0	0	30.8	0.08	10.3	-1.5	50.4	18.5	Absence	0
420	Little Pine Moorland 2	MSR	Wombat	6	U	1005	61	0	4	0	61	2	0	0	35	0	0	0	0	11.1	0.05	10.1	-1.5	50.4	18.5	Presence	2
421	Queensberry Track 1	MSR	Wombat	0	B	145	0	0	10	0	0	2	0	0	10	0	10	0	80	46.5	0.02	14.6	3.6	58.9	21.7	Absence	0
422	Queensberry Track 1	MSR	Wombat	0	B	145	0	10	10	0	10	2	0	0	30	60	0	2	20	45.8	0.3	14.2	3.6	58.9	21.7	Absence	0
423	Queensberry Track 1	MSR	Wombat	0	B	144	0	7	10	0	7	1	0	0	75	8	0	11	30	60.3	0	13.6	3.6	58.9	21.7	Absence	0
424	Queensberry Track 1	MSR	Wombat	0	B	148	0	0	2	0	0	1	0	0	25	20	0	10	45	57.4	0.03	13.1	3.6	58.9	21.7	Absence	0
425	Queensberry Track 1	MSR	Wombat	0	B	148	0	3	10	0	3	1	0	0	65	3	0	1	30	50.2	0.02	12.7	3.6	58.9	21.7	Absence	0
426	Queensberry Track 1	MSR	Wombat	0	B	152	0	0	5	1	0	1	0	0	50	5	0	40	10	47.1	0.07	12.7	3.6	58.9	21.7	Absence	0
427	Queensberry Track 2	MSR	Wombat	0	U	149	0	2	0	0	2	2	0	0	70	30	0	2	0	53.2	0.1	12.2	3.6	59.3	21.6	Absence	0
428	Queensberry Track 2	MSR	Wombat	4	U	148	0	2	0	0	2	2	0	0	45	55	0	0	0	45.9	0.11	12.2	3.6	59.3	21.6	Presence	2
429	Queensberry Track 2	MSR	Wombat	0	U	149	0	1	0	0	1	2	0	0	75	25	0	0	0	36.7	0.04	12.2	3.6	59.3	21.6	Absence	0
430	Queensberry Track 2	MSR	Wombat	0	U	151	0	1	2	0	1	1	0	0	75	7	0	0	15	45.3	0.09	11.9	3.6	59.3	21.6	Absence	0
431	Queensberry Track 2	MSR	Wombat	0	U	150	0	8	2	0	8	1	0	0	40	40	0	15	0	44.1	0.22	12	3.6	59.3	21.6	Absence	0
432	Queensberry Track 2	MSR	Wombat	0	U	149	40	0	0	0	40	2	0	0	0	50	10	0	0	31.1	0.06	11.9	3.6	59.3	21.6	Absence	0
433	Mt Zeehan 1	MSR	Wombat	0	B	180	90	0	4	4	90	2	4	0	2	0	0	8	0	40.6	0	8.7	2.6	74.6	22	Absence	0
434	Mt Zeehan 1	MSR	Wombat	0	B	186	30	0	40	15	30	3	0	0	0	2	0	25	0	47.5	0.2	9.5	2.6	74.6	22	Absence	0
435	Mt Zeehan 1	MSR	Wombat	0	B	185	80	2	10	0	82	3	0	0	6	2	0	8	0	57.5	0.2	10.5	2.6	74.6	22	Absence	0
436	Mt Zeehan 1	MSR	Wombat	0	B	187	75	2	20	0	77	3	0	0	3	0	0	8	0	52.6	0.14	11.3	2.6	74.6	22	Absence	0
437	Mt Zeehan 1	MSR	Wombat	0	B	192	20	0	45	10	20	4	0	0	20	5	0	4	0	35.3	0.14	12.3	2.6	74.6	22	Absence	0
438	Mt Zeehan 1	MSR	Wombat	0	B	194	4	1	0	85	5	4	0	0	0	10	0	0	0	18	0.05	12.8	2.6	74.6	22	Absence	0
439	Mt Zeehan 2	MSR	Wombat	0	U	184	35	0	5	2	35	2	0	0	20	30	10	12	10	35.5	0.11	14	2.6	75.9	22.2	Absence	0
440	Mt Zeehan 2	MSR	Wombat	0	U	185	4	0	0	1	4	2	4	0	70	0	5	20	25	32.7	0.06	13.9	2.6	75.9	22.2	Absence	0
441	Mt Zeehan 2	MSR	Wombat	0	U	185	0	1	0	2	1	3	0	0	0	0	20	98	0	16.5	0	14.7	2.6	75.9	22.2	Absence	0
442	Mt Zeehan 2	MSR	Wombat	0	U	182	0	2	20	4	2	4	0	0	30	2	50	40	10	22.2	0.12	15.4	2.6	75.9	22.2	Absence	0
443	Mt Zeehan 2	MSR	Wombat	1	U	178	0	2	0	0	2	4	0	0	20	40	40	15	10	25.2	0.25	16.1	2.6	75.9	22.2	Presence	1
444	Mt Zeehan 2	MSR	Wombat	0	U	174	0	0	0	0	0	3	0	0	5	80	15	0	0	30.7	0.07	16.3	2.6	75.9	22.2	Absence	0
445	Zeehan 3	MSR	Wombat	0	B	235	0	2	50	0	2	2	3	0	44	3	0	2	0	44	0.07	17	4	50.3	21	Absence	0
446	Zeehan 3	MSR	Wombat	0	B	237	0	0	2	0	0	2	0	0	70	2	0	70	0	41.5	0.12	18.8	4	50.3	21	Absence	0
447	Zeehan 3	MSR	Wombat	0	B	236	0	0	20	0	0	2	10	0	35	5	0	30	0	43.3	0.1	17.7	4	50.3	21	Absence	0
448	Zeehan 3	MSR	Wombat	0	B	236	0	2	0	0	2	3	50	0	25	5	0	35	0	42	0.08	19.7	4	50.3	21	Absence	0
449	Zeehan 3	MSR	Wombat	0	B	238	0	0	5	0	0	4	3	0	60	8	0	60	0	48.7	0.05	20.1	4	50.3	21	Absence	0
450	Zeehan 3	MSR	Wombat	0	B	238	0	0	60	0	0	3	0	0	45	5	0	0	0	48.6	0.08	19.8	4	50.3	21	Absence	0
451	Zeehan 4	MSR	Wombat	0	U	211	0	0	0	0	0	2	0	0	60	60	0	0	0	50.4	0.02	16.5	4	49.1	21.4	Absence	0
452	Zeehan 4	MSR	Wombat	0	U	214	0	0	0	0	0	2	0	0	50	50	0	0	10	49.7	0.07	16.3	4	49.1	21.4	Absence	0
453	Zeehan 4	MSR	Wombat	0	U	217	0	10	0	0	10	2	0	0	40	50	0	2	5	38.5	0.02	16	4	49.1	21.4	Absence	0
454	Zeehan 4	MSR	Wombat	0	U	216	0	0	0	0	0	3	0	0	90	10	0	4	0	36.1	0.08	15.8	4	49.1	21.4	Absence	0
455	Zeehan 4	MSR	Wombat	0	U	218	0	0	0	0	0	4	0	0	90	0	0	0	10	59.3	0.13	16.1	4	49.1	21.4	Absence	0
456	Zeehan 4	MSR	Wombat	0	U	219	0	0	0	0	0	4	0	0	80	20	0	0	0	43.7	0.05	16.2	4	49.1	21.4	Absence	0
457	Northern Grassland 1	G	Wombat	0	B	669	95	20	0	0	115	1	0	0	0	0	0	2	0	38	0.18	9.1	0.1	45.3	19.8	Absence	0
458	Northern Grassland 1	G	Wombat	0	B	668	90	0	0	0	90	1	0	0	5	0	0	4	0	24.6	0.05	10.3	0.1	45.3	19.8	Absence	0
459	Northern Grassland 1	G	Wombat	0	B	670	90	11	0	0	101	1	0	0	2	0	2	2	0	37.3	0.08	10.8	0.1	45.3	19.8	Absence	0
460	Northern Grassland 1	G	Wombat	11	B	669	94	12	0	0	106	1	0	0	0	0	0	2	0	16	0.06	11.7	0.1	45.3	19.8	Presence	2
461	Northern Grassland 1	G	Wombat	0	B	669	92	5	8	0	97	1	0	0	0	0	0	3	0	9.3	0	12.6	0.1	45.3	19.8	Absence	0
462	Northern Grassland 1	G	Wombat	0	B	669	98	5	0	0	103	1	0	0	0	0	0	1	0	27.2	0.09	13.1	0.1	45.3	19.8	Absence	0
463	Northern Grassland 2	G	Wombat	0	U	667	100	3	0	0	103	1	0	0	0	0	0	1	0	13.9	0.04	14.2	0.1	44.9	19.9	Absence	0
464	Northern Grassland 2	G	Wombat	0	U	667	100	3	0	0	103	1	0	0	0	0	0	1	0	11.8	0.02	15	0.1	44.9	19.9	Absence	0
465	Northern Grassland 2	G	Wombat	0	U	667	100	2	0	0	102	1	0	0	0	0	0	2	0	27.6	0.04	15.4	0.1	44.9	19.9	Absence	0
466	Northern Grassland 2	G	Wombat	0	U	671	97	2	0	0	99	1	0	0	3	0	0	0	0	23.2	0.03	15.5	0.1	44.9	19.9	Absence	0
467	Northern Grassland 2	G	Wombat	0	U	672	96	11	0	0	107	2	0	0	0	0	0	5	0	16.6	0.02	15.9	0.1	44.9	19.9	Absence	0
468	Northern Grassland 2	G	Wombat	0	U	669	97	3	0	0	100	1	0	0	2	0	0	2	0	11.3	0.05	19.4	0.1	44.9	19.9	Absence	0
469	Grassland Hill 1	G	Wombat	1	B	686	46	50	0	2	96	2	0	0	0	0	4	40	0	14.4	0.03	9.8	1.5	53.9	19.8	Presence	1
470	Grassland Hill 1	G	Wombat	0	B	686	45	14	2	2	59	2	0	0	0	0	0	51	0	22.1	0.06	11.6	1.5	53.9	19.8	Absence	0
471	Grassland Hill 1	G	Wombat	2	B	689	75	2	5	0	77	2	0	0	0	1	0	24	0	10.3	0.09	16	1.5	53.9	19.8	Presence	1
472	Grassland Hill 1	G	Wombat	0	B	693	89	1	0	0	90	2	0	0	0	0	0	11	0	21.5	0.02	18.2	1.5	53.9	19.8	Absence	0
473	Grassland Hill 1	G	Wombat	4	B	692	33	51	0	4	84	2	0	0	0	0	0	12	0	18.2	0.03	19.5	1.5	53.9	19.8	Presence	2
474	Grassland Hill 1	G	Wombat	0	B	693	98	1	0	1	99	2	0	0	0	0	0	0	2	11.5	0.03	19	1.5	53.9	19.8	Absence	0
475	Grassland Hill 2	G	Wombat	0	U	641	96	78	2	0	174	1	0	0	0	0	0	0	0	19.9	0.04	18.2	1.5	43.8	20.1	Absence	0
476	Grassland Hill 2	G	Wombat	0	U	640	96	2	1	0	98	1	0	0	0	0	0	2	0	32.3	0.08	18.1	1.5	43.8	20.1	Absence	0
477	Grassland Hill 2	G	Wombat	1	U	640	64	2	15	0	66	1	0	0	0	0	0	18	3	21.2	0.05	18.2	1.5	43.8	20.1	Presence	1
478	Grassland Hill 2	G	Wombat	2	U	638	88	2	0	0	90	1	0	0	0	0	0	12	0	17.8	0.06	19.2	1.5	43.8	20.1	Presence	1
479	Grassland Hill 2	G	Wombat	0	U	636	100	1	0	0	101	1	0	0	0	0	0	3	0	17.6	0.06	19	1.5	43.8	20.1	Absence	0
480	Grassland Hill 2	G	Wombat	0	U	639	83	5	2	0	88	2	0	0	0	0	0	10	0	16.3	0.04	18.8	1.5	43.8	20.1	Absence	0
505	RRiverRoad 3	WE	Wombat	0	B	378	0	5	3	2	5	3	20	30	0	15	0	60	30	15.9	0.05	10.3	2.1	54.9	21.6	Absence	0
506	RRiverRoad 3	WE	Wombat	0	B	377	0	3	15	2	3	2	10	50	0	0	0	35	35	11.8	0	10.3	2.1	54.9	21.6	Absence	0
507	RRiverRoad 3	WE	Wombat	0	B	385	0	2	0	0	2	2	60	35	1	0	0	10	50	9.4	0.05	10.5	2.1	54.9	21.6	Absence	0
508	RRiverRoad 3	WE	Wombat	0	B	386	0	1	3	0	1	2	0	70	0	0	0	10	90	34.9	0.05	10.4	2.1	54.9	21.6	Absence	0
509	RRiverRoad 3	WE	Wombat	0	B	381	0	1	0	0	1	2	0	70	0	1	0	50	60	22.1	0.09	10.6	2.1	54.9	21.6	Absence	0
510	RRiverRoad 3	WE	Wombat	0	B	383	0	0	0	0	0	2	0	90	0	0	0	5	100	21	0.09	10.6	2.1	54.9	21.6	Absence	0
511	RRiverRoad 2	WE	Wombat	0	U	384	0	0	0	5	0	2	0	65	1	0	0	3	95	8.9	0	14.6	2.1	56.1	21.5	Absence	0
512	RRiverRoad 2	WE	Wombat	0	U	383	0	2	2	3	2	2	0	90	0	0	0	20	75	11.5	0.05	13.6	2.1	56.1	21.5	Absence	0
513	RRiverRoad 2	WE	Wombat	0	U	383	0	0	0	70	0	1	0	45	0	0	0	75	50	18.9	0.06	13.1	2.1	56.1	21.5	Absence	0
514	RRiverRoad 2	WE	Wombat	0	U	379	0	0	3	8	0	2	70	90	1	0	0	60	20	16.6	0.15	12.7	2.1	56.1	21.5	Absence	0
515	RRiverRoad 2	WE	Wombat	0	U	379	0	0	0	3	0	2	0	75	0	0	0	60	70	10.4	0.04	11.8	2.1	56.1	21.5	Absence	0
516	RRiverRoad 2	WE	Wombat	0	U	380	0	0	0	0	0	2	0	95	0	0	0	2	98	22.2	0.01	11	2.1	56.1	21.5	Absence	0
517	Hartz 2	WE	Wombat	0	B	303	0	2	0	0	2	2	22	30	2	7	6	75	55	19.3	0.11	8.6	3	51.2	21.7	Absence	0
518	Hartz 2	WE	Wombat	0	B	284	0	1	6	0	1	2	18	20	1	1	0	26	55	21.2	0.03	9.2	3	51.2	21.7	Absence	0
519	Hartz 2	WE	Wombat	0	B	285	0	1	9	4	1	2	0	45	0	0	0	5	11	17.4	0	9.4	3	51.2	21.7	Absence	0
520	Hartz 2	WE	Wombat	0	B	283	0	0	0	1	0	3	3	55	2	0	1	78	94	30.7	0.08	10	3	51.2	21.7	Absence	0
521	Hartz 2	WE	Wombat	0	B	290	0	3	0	0	3	2	40	45	0	0	0	23	40	6.9	0	10.4	3	51.2	21.7	Absence	0
522	Hartz 2	WE	Wombat	0	B	287	0	5	6	5	5	3	14	50	1	1	0	28	40	16.2	0.05	10.5	3	51.2	21.7	Absence	0
523	Hartz 1	WE	Wombat	0	U	313	0	0	0	0	0	3	3	80	0	0	2	3	96	24.4	0.03	9.6	3	53	21.7	Absence	0
524	Hartz 1	WE	Wombat	0	U	310	0	0	0	0	0	3	15	70	0	2	0	65	82	35.7	0.09	9.3	3	53	21.7	Absence	0
525	Hartz 1	WE	Wombat	0	U	311	0	0	0	0	0	2	6	80	0	0	0	9	100	10.6	0.06	9.1	3	53	21.7	Absence	0
526	Hartz 1	WE	Wombat	0	U	311	0	0	0	0	0	2	23	70	0	4	0	25	80	28.1	0.06	8.6	3	53	21.7	Absence	0
527	Hartz 1	WE	Wombat	0	U	306	0	0	0	0	0	2	5	65	0	0	0	2	100	26.1	0.03	8.5	3	53	21.7	Absence	0
528	Hartz 1	WE	Wombat	0	U	303	0	0	6	0	0	3	18	40	0	0	0	25	76	33.8	0.05	8.7	3	53	21.7	Absence	0
529	Hartz 4	WE	Wombat	0	B	166	0	1	0	0	1	3	0	50	0	3	8	12	90	7.1	0.1	10.6	3.4	57.7	22.2	Absence	0
530	Hartz 4	WE	Wombat	0	B	162	0	1	4	1	1	3	55	60	0	0	2	4	35	3.9	0.03	10.7	3.4	57.7	22.2	Absence	0
531	Hartz 4	WE	Wombat	0	B	159	0	0	5	0	0	4	22	50	0	1	1	38	40	2.2	0.02	10.9	3.4	57.7	22.2	Absence	0
532	Hartz 4	WE	Wombat	0	B	158	0	0	24	9	0	3	12	45	0	0	0	26	55	12.5	0.01	11.1	3.4	57.7	22.2	Absence	0
533	Hartz 4	WE	Wombat	0	B	157	0	0	2	0	0	3	3	50	0	0	0	3	94	3.7	0.04	11.1	3.4	57.7	22.2	Absence	0
534	Hartz 4	WE	Wombat	0	B	157	0	1	3	0	1	2	3	40	0	0	0	34	75	12.4	0.02	11.2	3.4	57.7	22.2	Absence	0
535	Hartz 3	WE	Wombat	0	U	275	0	0	16	1	0	2	3	40	0	2	0	81	45	6.9	0	11.7	3.4	62.5	20.8	Absence	0
536	Hartz 3	WE	Wombat	0	U	308	0	1	3	3	1	2	0	60	0	0	0	8	97	22.6	0.02	11.8	3.4	62.5	20.8	Absence	0
537	Hartz 3	WE	Wombat	0	U	300	0	0	3	9	0	3	9	60	0	0	0	17	81	5.5	0	11.6	3.4	62.5	20.8	Absence	0
538	Hartz 3	WE	Wombat	0	U	303	0	0	2	55	0	4	0	70	0	0	0	4	60	14.2	0	11.3	3.4	62.5	20.8	Absence	0
539	Hartz 3	WE	Wombat	0	U	316	0	0	0	0	0	3	0	50	100	0	0	0	0	15	0.03	11	3.4	62.5	20.8	Absence	0
540	Hartz 3	WE	Wombat	0	U	317	0	3	0	2	3	3	0	30	0	0	8	6	87	45.3	0.13	10.8	3.4	62.5	20.8	Absence	0
541	Fingal 3	WE	Wombat	0	B	813	0	5	2	15	5	2	0	40	0	6	0	2	85	14.6	0.01	12.4	1.3	82.5	19.3	Absence	0
542	Fingal 3	WE	Wombat	0	B	809	0	20	0	95	20	2	0	40	0	2	2	2	25	36.3	0.04	12.5	1.3	82.5	19.3	Absence	0
543	Fingal 3	WE	Wombat	0	B	807	2	3	0	10	5	3	0	10	0	5	0	0	86	14.1	0.02	12.7	1.3	82.5	19.3	Absence	0
544	Fingal 3	WE	Wombat	0	B	815	1	1	0	95	2	3	5	0	0	2	0	20	0	5.1	0.02	13.1	1.3	82.5	19.3	Absence	0
545	Fingal 3	WE	Wombat	0	B	814	0	4	0	35	4	3	60	40	0	2	0	2	5	17.8	0	13.3	1.3	82.5	19.3	Absence	0
546	Fingal 3	WE	Wombat	0	B	815	0	35	0	85	35	2	0	30	0	2	0	6	5	12.9	0	13.2	1.3	82.5	19.3	Absence	0
547	Fingal 4	WE	Wombat	0	U	802	1	4	0	3	5	2	5	45	0	0	0	1	97	15.6	0	13.7	1.3	82.5	19.3	Absence	0
548	Fingal 4	WE	Wombat	0	U	801	0	8	10	0	8	2	40	60	0	0	2	20	50	18.1	0	13.6	1.3	82.6	19.3	Absence	0
549	Fingal 4	WE	Wombat	0	U	800	0	0	0	0	0	2	2	65	0	0	94	0	4	36.3	0.08	12.8	1.3	82.6	19.3	Absence	0
550	Fingal 4	WE	Wombat	0	U	799	0	0	0	0	0	2	0	60	0	0	70	0	30	31.3	0.06	12.9	1.3	82.6	19.3	Absence	0
551	Fingal 4	WE	Wombat	0	U	794	0	3	0	1	3	2	5	50	0	0	5	3	97	19.2	0.06	12.8	1.3	82.6	19.3	Absence	0
552	Fingal 4	WE	Wombat	0	U	792	0	4	0	0	4	2	2	45	0	0	7	0	96	11.3	0.04	12.8	1.3	82.6	19.3	Absence	0
553	Musselroe 1	SHC	Wombat	0	B	6	2	3	9	0	5	2	0	0	65	21	0	1	0	10.5	0	14	5.1	37.7	22.2	Absence	0
554	Musselroe 1	SHC	Wombat	0	B	3	0	6	12	0	6	2	0	0	85	0	0	0	0	19.2	0.01	14.4	5.1	37.7	22.2	Absence	0
555	Musselroe 1	SHC	Wombat	0	B	2	0	12	10	0	12	2	0	0	78	2	0	1	0	23.2	0.04	16.5	5.1	37.7	22.2	Absence	0
556	Musselroe 1	SHC	Wombat	0	B	0	0	1	18	0	1	2	0	0	71	10	0	0	0	4.3	0	18.8	5.1	37.7	22.2	Absence	0
557	Musselroe 1	SHC	Wombat	0	B	1	0	2	30	0	2	2	0	0	70	0	0	0	0	14.6	0.02	19.5	5.1	37.7	22.2	Absence	0
558	Musselroe 1	SHC	Wombat	1	B	0	0	1	4	0	1	2	40	0	75	12	0	2	0	8.6	0.06	20.1	5.1	37.7	22.2	Presence	1
559	Musselroe 2	SHC	Wombat	0	U	3	0	4	0	0	4	2	0	0	84	12	0	2	0	19.6	0.01	21.7	5.1	37.3	22.3	Absence	0
560	Musselroe 2	SHC	Wombat	0	U	5	0	2	0	0	2	2	0	0	95	4	0	2	0	16.9	0.01	21.5	5.1	37.3	22.3	Absence	0
561	Musselroe 2	SHC	Wombat	0	U	6	0	4	0	0	4	2	0	0	70	30	0	0	0	17.6	0.03	21.3	5.1	37.3	22.3	Absence	0
562	Musselroe 2	SHC	Wombat	0	U	5	0	12	1	0	12	2	0	0	80	6	0	1	0	17.6	0	21.4	5.1	37.3	22.3	Absence	0
563	Musselroe 2	SHC	Wombat	0	U	5	0	5	0	0	5	2	0	0	65	30	0	1	0	17.7	0.01	21.6	5.1	37.3	22.3	Absence	0
564	Musselroe 2	SHC	Wombat	2	U	5	12	1	1	0	13	2	2	0	84	10	0	2	0	17.3	0	21.6	5.1	37.3	22.3	Presence	1
565	Akaroa 1	SHC	Wombat	0	B	21	0	2	20	0	2	1	0	0	80	2	0	0	10	6.2	0.02	13.1	5.5	50.3	21.7	Absence	0
566	Akaroa 1	SHC	Wombat	0	B	23	0	4	40	0	4	1	0	0	60	0	0	0	15	11	0	13.3	5.5	50.3	21.7	Absence	0
567	Akaroa 1	SHC	Wombat	0	B	24	0	2	40	0	2	1	2	0	40	2	0	0	25	8.3	0.07	13.8	5.5	50.3	21.7	Absence	0
568	Akaroa 1	SHC	Wombat	0	B	25	0	2	80	0	2	2	1	0	15	2	0	0	15	8.2	0	14.2	5.5	50.3	21.7	Absence	0
569	Akaroa 1	SHC	Wombat	0	B	23	0	2	70	0	2	2	0	0	35	0	0	0	2	4	0.02	14.5	5.5	50.3	21.7	Absence	0
570	Akaroa 1	SHC	Wombat	0	B	23	0	2	30	0	2	2	6	0	30	0	0	1	40	2.9	0	14.9	5.5	50.3	21.7	Absence	0
571	Akaroa 2	SHC	Wombat	0	U	19	0	10	2	0	10	1	0	0	30	55	5	1	0	4.3	0	15.6	5.5	50.6	21.7	Absence	0
572	Akaroa 2	SHC	Wombat	0	U	18	0	4	1	0	4	2	0	0	10	65	0	0	20	9.3	0.02	15.8	5.5	50.6	21.7	Absence	0
573	Akaroa 2	SHC	Wombat	0	U	16	5	2	2	0	7	2	0	0	25	50	20	2	40	7	0	16	5.5	50.6	21.7	Absence	0
574	Akaroa 2	SHC	Wombat	0	U	15	0	5	20	0	5	2	25	0	25	25	20	3	15	3.4	0	16.1	5.5	50.6	21.7	Absence	0
575	Akaroa 2	SHC	Wombat	0	U	15	0	0	1	0	0	2	0	0	5	65	20	1	15	3	0	16.3	5.5	50.6	21.7	Absence	0
576	Akaroa 2	SHC	Wombat	0	U	13	0	2	5	0	2	2	0	0	10	10	60	3	40	9.9	0.08	16.5	5.5	50.6	21.8	Absence	0
577	Ida Bay 1	SHC	Wombat	0	B	14	80	2	2	0	82	2	4	0	2	15	0	0	10	29.6	0.02	13.4	4.4	56.7	21.8	Absence	0
578	Ida Bay 1	SHC	Wombat	0	B	14	10	0	2	0	10	2	10	0	0	25	65	1	0	30	0.16	13.4	4.4	56.7	21.8	Absence	0
579	Ida Bay 1	SHC	Wombat	0	B	15	35	2	0	0	37	2	8	0	0	15	45	2	0	39.6	0.06	13.6	4.4	56.7	21.8	Absence	0
580	Ida Bay 1	SHC	Wombat	0	B	17	55	2	0	0	57	2	4	0	2	45	5	0	0	36.3	0.06	14.2	4.4	56.7	21.8	Absence	0
581	Ida Bay 1	SHC	Wombat	0	B	13	35	2	2	0	37	2	20	0	0	45	10	0	0	45.3	0.08	14.8	4.4	56.7	21.8	Absence	0
582	Ida Bay 1	SHC	Wombat	0	B	15	60	2	0	0	62	2	0	0	0	15	15	0	5	32.7	0.11	15.1	4.4	56.7	21.8	Absence	0
583	Ida Bay 2	SHC	Wombat	0	U	9	15	1	0	10	16	2	0	0	10	0	30	5	45	22.6	0	15.3	4.4	56.7	21.8	Absence	0
584	Ida Bay 2	SHC	Wombat	0	U	9	0	0	0	0	0	2	0	0	100	0	0	0	0	62.2	0.18	15.2	4.4	57.3	21.8	Absence	0
585	Ida Bay 2	SHC	Wombat	0	U	10	20	0	0	0	20	2	8	0	0	50	0	0	60	27.4	0	14.9	4.4	57.3	21.8	Absence	0
586	Ida Bay 2	SHC	Wombat	0	U	14	0	0	0	0	0	2	0	0	100	0	0	0	0	53.2	0.14	15	4.4	57.3	21.8	Absence	0
587	Ida Bay 2	SHC	Wombat	0	U	14	0	0	0	0	0	2	0	0	100	0	0	0	0	40.7	0.09	14.2	4.4	57.3	21.8	Absence	0
588	Ida Bay 2	SHC	Wombat	0	U	12	0	2	0	0	2	2	0	0	10	0	0	10	80	38.4	0.07	14.4	4.4	57.3	21.8	Absence	0
589	Zeehan Coastal 1	SHC	Wombat	0	B	207	0	1	15	0	1	2	0	0	75	10	0	4	0	38.9	0.01	16.8	3.5	50.3	21.3	Absence	0
590	Zeehan Coastal 1	SHC	Wombat	0	B	210	0	0	10	0	0	2	0	0	85	5	0	3	0	39	0.07	16.1	3.5	50.3	21.3	Absence	0
591	Zeehan Coastal 1	SHC	Wombat	0	B	213	0	0	15	0	0	2	0	0	80	1	0	10	0	48.3	0.03	15.9	3.5	50.3	21.3	Absence	0
592	Zeehan Coastal 1	SHC	Wombat	0	B	214	0	1	5	0	1	2	0	0	95	0	0	0	0	43.3	0	14.9	3.5	50.3	21.3	Absence	0
593	Zeehan Coastal 1	SHC	Wombat	0	B	212	0	1	1	0	1	2	0	0	98	2	0	8	0	44.7	0.02	14.8	3.5	50.3	21.3	Absence	0
594	Zeehan Coastal 1	SHC	Wombat	0	B	213	0	2	40	0	2	2	0	0	60	0	0	1	0	37.9	0.03	15	3.5	50.3	21.3	Absence	0
595	Zeehan Coastal 2	SHC	Wombat	0	U	231	0	2	0	0	2	2	0	0	98	2	0	1	10	47.6	0	19.5	3.5	52.3	20.9	Absence	0
596	Zeehan Coastal 2	SHC	Wombat	0	U	232	0	0	0	0	0	2	0	0	80	8	0	0	12	47.1	0.02	19.3	3.5	52.3	20.9	Absence	0
597	Zeehan Coastal 2	SHC	Wombat	0	U	236	0	0	0	0	0	2	0	0	40	55	0	0	15	41.9	0.09	18.8	3.5	52.3	20.9	Absence	0
598	Zeehan Coastal 2	SHC	Wombat	0	U	240	0	0	0	0	0	2	0	0	85	15	0	0	0	55	0	18.3	3.5	52.3	20.9	Absence	0
599	Zeehan Coastal 2	SHC	Wombat	0	U	241	0	0	0	0	0	2	0	0	95	5	0	0	5	42.3	0.07	18	3.5	52.3	20.9	Absence	0
600	Zeehan Coastal 2	SHC	Wombat	0	U	243	0	0	0	0	0	2	0	0	55	45	0	0	0	47.8	0.09	17.7	3.5	52.3	20.9	Absence	0

## Sheet: Deer
Number	Location	TASVEG	Herbivore	Scat	Fire	Elevation	Grass	Herb	Bare	Rock	Fodder	Slope	CWD	Canopy	Sedge	Shrub	Fern	Moss	Litter	SoilM	SoilC	SoilT	MinJuly	MARfeb	Maxjan	Scatclass	Scatclass2
901	Sunny Hills 1	DE	Deer	0	B	171	0	1	2	0	1	3	5	55	0	0	7	2	95	6.8	0.04	13.5	3.6	56.1	21.7	Absence	0
902	Sunny Hills 1	DE	Deer	0	B	168	0	2	35	0	2	3	0	55	0	0	35	0	65	7	0.08	13.8	3.6	56.1	21.7	Absence	0
903	Sunny Hills 1	DE	Deer	0	B	171	0	1	75	2	1	4	3	30	0	0	10	5	20	4.3	0.02	14	3.6	56.1	21.7	Absence	0
904	Sunny Hills 1	DE	Deer	0	B	178	0	1	30	2	1	4	0	55	2	0	6	0	70	9.1	0.02	14.2	3.6	56.1	21.7	Absence	0
905	Sunny Hills 1	DE	Deer	0	B	179	4	2	40	1	6	4	15	40	5	0	0	0	40	14.2	0	14.3	3.6	56.1	21.7	Absence	0
906	Sunny Hills 1	DE	Deer	0	B	177	0	2	30	35	2	4	0	20	15	0	4	20	30	6.5	0.02	14.3	3.6	56.1	21.7	Absence	0
907	Sunny Hills 2	DE	Deer	0	U	171	0	2	10	0	2	2	20	30	2	0	2	4	70	9.6	0.1	14.5	3.6	56.4	21.7	Absence	0
908	Sunny Hills 2	DE	Deer	0	U	175	0	0	40	0	0	3	0	70	2	0	3	0	60	4.8	0.01	14.3	3.6	56.4	21.7	Absence	0
909	Sunny Hills 2	DE	Deer	0	U	174	0	0	0	0	0	3	0	10	2	0	70	10	50	6.2	0	14.4	3.6	56.4	21.7	Absence	0
910	Sunny Hills 2	DE	Deer	0	U	170	0	0	0	0	0	3	0	70	3	0	30	0	70	11	0	15.1	3.6	56.4	21.7	Absence	0
911	Sunny Hills 2	DE	Deer	0	U	175	0	0	8	0	0	3	0	60	4	0	5	0	90	6	0	15.9	3.6	56.4	21.7	Absence	0
912	Sunny Hills 2	DE	Deer	0	U	174	0	3	0	0	3	2	0	10	3	0	5	35	60	10	0	16.3	3.6	56.4	21.7	Absence	0
913	Five Rivers 2	DE	Deer	0	B	814	5	80	8	0	85	2	0	0	0	16	0	10	2	23.2	0.05	15.8	-0.2	49.9	19.3	Absence	0
915	Five Rivers 2	DE	Deer	0	B	821	10	65	12	5	75	1	0	0	0	0	0	3	5	5	0.02	17.3	-0.2	49.9	19.3	Absence	0
917	Five Rivers 2	DE	Deer	0	B	827	10	30	35	20	40	2	0	0	0	0	0	5	2	14.8	0.04	15.6	-0.2	49.9	19.3	Absence	0
918	Five Rivers 2	DE	Deer	0	B	828	5	10	10	60	15	2	0	10	0	0	0	0	40	16.7	0	14.2	-0.2	49.9	19.3	Absence	0
919	Five Rivers 1	DE	Deer	0	U	864	15	12	1	2	27	1	0	50	2	0	0	2	70	8.3	0.02	15.8	-0.2	59.5	19	Absence	0
920	Five Rivers 1	DE	Deer	0	U	856	30	15	1	0	45	1	0	30	0	25	0	2	50	6	0	15.6	-0.2	59.5	19	Absence	0
921	Five Rivers 1	DE	Deer	0	U	858	6	3	3	2	9	1	0	30	6	50	0	10	40	4.9	0	15.5	-0.2	59.5	19	Absence	0
922	Five Rivers 1	DE	Deer	0	U	853	5	5	2	0	10	1	0	0	0	50	0	30	30	12.5	0.02	14.7	-0.2	59.5	19	Absence	0
923	Five Rivers 1	DE	Deer	0	U	853	55	25	3	2	80	1	10	0	0	20	0	5	10	6.4	0.07	14.4	-0.2	59.5	19	Absence	0
924	Five Rivers 1	DE	Deer	0	U	850	90	6	0	0	96	2	0	40	0	0	0	1	30	6.6	0.05	13.4	-0.2	59.5	19	Absence	0
925	Euc Home 1	DE	Deer	0	B	643	5	6	1	17	11	3	3	45	0	18	0	13	60	8.1	0	13.9	0.7	48.7	20	Absence	0
926	Euc Home 1	DE	Deer	0	B	646	2	3	0	2	5	2	4	55	5	2	0	7	96	7.1	0.07	12.9	0.7	48.7	20	Absence	0
927	Euc Home 1	DE	Deer	0	B	643	1	1	0	1	2	2	0	55	0	86	0	1	55	8.2	0.12	12.2	0.7	48.7	20	Absence	0
928	Euc Home 1	DE	Deer	0	B	644	1	2	0	0	3	2	4	20	5	14	0	5	98	15.4	0.08	11.7	0.7	48.7	20	Absence	0
929	Euc Home 1	DE	Deer	0	B	643	2	2	1	82	4	2	0	55	0	3	0	80	17	5.2	0.05	10.9	0.7	48.7	20	Absence	0
932	Euc Home 2	DE	Deer	0	U	652	86	2	0	0	88	2	0	0	0	9	0	7	13	7.7	0.03	7.1	0.7	49.6	19.8	Absence	0
933	Euc Home 2	DE	Deer	0	U	644	4	0	0	0	4	2	0	60	0	100	0	0	30	16.9	0.1	7.1	0.7	49.6	19.8	Absence	0
934	Euc Home 2	DE	Deer	0	U	644	94	4	0	0	98	2	0	60	0	0	0	2	20	16.4	0.04	7.2	0.7	49.6	19.8	Absence	0
935	Euc Home 2	DE	Deer	0	U	650	4	0	0	0	4	2	0	55	0	100	0	0	6	7.9	0.03	8.2	0.7	49.6	19.8	Absence	0
937	Fingal 1	DE	Deer	0	B	454	60	11	15	5	71	2	1	0	5	0	0	1	2	39.4	0.03	11.5	2.2	55.5	22.2	Absence	0
938	Fingal 1	DE	Deer	0	B	456	15	6	50	25	21	2	0	0	2	0	0	2	2	26	0.12	11.6	2.2	55.5	22.2	Absence	0
939	Fingal 1	DE	Deer	0	B	460	0	6	10	50	6	3	0	0	40	0	0	4	1	23.5	0.09	11.9	2.2	55.5	22.2	Absence	0
940	Fingal 1	DE	Deer	0	B	463	0	1	3	20	1	2	4	30	3	2	0	1	85	16.5	0.05	12.5	2.2	55.5	22.2	Absence	0
941	Fingal 1	DE	Deer	0	B	457	4	3	6	30	7	2	2	50	0	2	0	3	65	17.6	0.07	13	2.2	55.5	22.2	Absence	0
942	Fingal 1	DE	Deer	0	B	456	65	3	4	4	68	3	10	40	12	0	0	1	5	31.7	0.13	13.2	2.2	55.5	22.2	Absence	0
943	Fingal 2	DE	Deer	0	U	432	80	5	0	0	85	2	6	10	10	0	0	2	0	15.1	0	10.8	2.2	49.5	22.3	Absence	0
944	Fingal 2	DE	Deer	0	U	433	3	2	0	0	5	2	0	10	85	0	0	6	6	24.2	0.05	10.9	2.2	49.5	22.3	Absence	0
945	Fingal 2	DE	Deer	0	U	430	65	4	2	0	69	2	4	40	12	0	0	4	10	14.1	0	11.2	2.2	49.5	22.3	Absence	0
946	Fingal 2	DE	Deer	0	U	432	81	4	0	0	85	2	6	55	8	0	0	1	50	6.5	0.08	11.3	2.2	49.5	22.3	Absence	0
947	Fingal 2	DE	Deer	0	U	431	9	0	0	0	9	2	80	45	2	0	0	0	90	19.1	0.04	11.5	2.2	49.5	22.3	Absence	0
948	Fingal 2	DE	Deer	0	U	434	0	3	0	1	3	2	4	30	95	0	0	3	6	19.6	0.05	11.5	2.2	49.5	22.3	Absence	0
949	Five Rivers 3	H	Deer	0	B	815	35	2	30	6	37	1	2	50	0	0	0	2	38	27.2	0.05	12.7	-0.4	50.7	19.4	Absence	0
950	Five Rivers 3	H	Deer	0	B	815	40	30	0	25	70	1	0	10	0	0	0	2	25	23.5	0.07	12.8	-0.4	50.7	19.4	Absence	0
951	Five Rivers 3	H	Deer	0	B	815	8	80	0	0	88	1	0	0	0	6	0	10	4	9.7	0.06	13.7	-0.4	50.7	19.4	Absence	0
952	Five Rivers 3	H	Deer	0	B	814	4	70	0	0	74	1	0	0	0	0	0	12	8	27.7	0.02	13.6	-0.4	50.7	19.4	Absence	0
953	Five Rivers 3	H	Deer	0	B	812	8	70	0	0	78	1	0	0	0	0	0	20	2	16.8	0.05	13.6	-0.4	50.7	19.4	Absence	0
954	Five Rivers 3	H	Deer	0	B	812	5	80	0	0	85	1	0	0	0	0	0	15	3	13.2	0	13.7	-0.4	50.7	19.4	Absence	0
955	Five Rivers 4	H	Deer	0	U	815	80	3	0	0	83	1	0	0	0	0	0	17	0	8.7	0	13	-0.4	50.8	19.5	Absence	0
956	Five Rivers 4	H	Deer	0	U	817	92	8	0	0	100	1	0	0	0	0	0	0	0	7.1	0.07	13	-0.4	50.8	19.5	Absence	0
957	Five Rivers 4	H	Deer	0	U	817	17	20	1	2	37	1	0	0	0	60	0	1	0	8.3	0.08	14.2	-0.4	50.8	19.5	Absence	0
958	Five Rivers 4	H	Deer	0	U	817	6	6	0	0	12	1	0	0	0	88	0	0	0	11.2	0.03	14.2	-0.4	50.8	19.5	Absence	0
964	Little Pine Lagoon 1	H	Deer	0	B	1012	3	22	18	6	25	1	7	0	0	0	0	60	0	20.7	0.05	12.5	-1.3	46.2	18.7	Absence	0
968	Little Pine Lagoon 2	H	Deer	0	U	1015	36	21	8	0	57	1	0	0	0	26	0	9	0	29.5	0.05	13.2	-1.3	46.3	18.7	Absence	0
969	Little Pine Lagoon 2	H	Deer	0	U	1014	16	2	0	0	18	1	0	0	0	79	0	3	0	19.2	0.06	13.2	-1.3	46.3	18.7	Absence	0
970	Little Pine Lagoon 2	H	Deer	0	U	1016	1	1	0	0	2	1	0	0	0	97	0	1	0	17.4	0.05	14.3	-1.3	46.3	18.7	Absence	0
971	Little Pine Lagoon 2	H	Deer	0	U	1020	0	2	0	0	2	1	0	0	0	90	0	6	2	21.8	0	15.2	-1.3	46.3	18.7	Absence	0
972	Little Pine Lagoon 2	H	Deer	0	U	1021	0	0	0	0	0	1	0	0	0	100	0	0	0	11.3	0.04	15.2	-1.3	46.3	18.7	Absence	0
973	Lake Augusta 1	H	Deer	0	B	1152	0	13	5	0	13	2	8	0	0	0	0	63	0	22.9	0.02	10.4	-1.7	53.4	18.3	Absence	0
974	Lake Augusta 1	H	Deer	0	B	1140	5	15	26	0	20	1	7	0	0	0	0	46	1	44.6	0.06	9.1	-1.7	53.4	18.3	Absence	0
975	Lake Augusta 1	H	Deer	0	B	1149	25	11	4	0	36	1	0	0	0	4	0	55	0	32.2	0.02	9.1	-1.7	53.4	18.3	Absence	0
976	Lake Augusta 1	H	Deer	0	B	1148	46	48	0	0	94	1	0	0	0	6	0	0	0	10.7	0.05	6.4	-1.7	53.4	18.3	Absence	0
978	Lake Augusta 1	H	Deer	0	B	1149	4	4	7	0	8	1	6	0	0	0	0	79	0	48.6	0.04	9.5	-1.7	53.4	18.3	Absence	0
979	Lake Augusta 2	H	Deer	0	U	1167	29	0	2	20	29	2	0	0	0	10	0	39	0	22.8	0.06	11.5	-1.7	53	18.4	Absence	0
980	Lake Augusta 2	H	Deer	0	U	1163	39	0	3	57	39	2	0	0	0	1	0	0	0	24.6	0.06	12	-1.7	53	18.4	Absence	0
982	Lake Augusta 2	H	Deer	0	U	1161	0	0	3	97	0	1	0	0	0	0	0	0	0	5.7	0.02	11.4	-1.7	53	18.4	Absence	0
984	Lake Augusta 2	H	Deer	0	U	1164	0	8	25	12	8	2	0	0	0	52	0	3	0	24.2	0.06	11.3	-1.7	53	18.4	Absence	0
989	Liaweenee 1	H	Deer	0	B	1068	4	12	55	45	16	1	0	0	0	0	0	3	0	18.1	0.04	6.9	-1.5	47.1	18.5	Absence	0
990	Liaweenee 1	H	Deer	0	B	1067	0	3	90	90	3	1	0	0	0	0	0	0	0	26	0.05	6.3	-1.5	47.1	18.5	Absence	0
992	Liaweenee 2	H	Deer	0	U	1066	62	4	8	5	66	1	0	0	0	0	0	21	0	25	0.06	5.6	-1.5	46.3	18.6	Absence	0
993	Liaweenee 2	H	Deer	0	U	1065	7	2	88	78	9	1	0	0	0	0	0	2	2	31.5	0.05	5.3	-1.5	46.3	18.6	Absence	0
997	Lake Augusta 3	H	Deer	0	B	1149	2	1	1	0	3	1	0	0	0	0	0	97	0	53.2	0.04	15.9	-1.7	53.7	18.3	Absence	0
998	Lake Augusta 3	H	Deer	0	B	1149	5	2	1	0	7	1	0	0	0	0	0	92	0	58.9	0.08	16.9	-1.7	53.7	18.3	Absence	0
999	Lake Augusta 3	H	Deer	0	B	1149	17	38	21	0	55	1	2	0	0	0	0	22	0	65.8	0.05	17	-1.7	53.7	18.3	Absence	0
1000	Lake Augusta 3	H	Deer	0	B	1148	6	58	9	0	64	1	8	0	0	0	0	22	0	70.1	0.18	19.9	-1.7	53.7	18.3	Absence	0
1001	Lake Augusta 3	H	Deer	0	B	1147	7	54	4	0	61	1	11	0	0	0	0	24	0	67.1	0.08	18.8	-1.7	53.7	18.3	Absence	0
1002	Lake Augusta 3	H	Deer	0	B	1147	28	90	0	0	118	1	0	0	0	6	0	22	0	56.6	0.03	18.2	-1.7	53.7	18.3	Absence	0
1004	Lake Augusta 4	H	Deer	0	U	1150	12	18	6	0	30	1	0	0	40	18	0	16	0	68.9	0.06	17.5	-1.7	53.8	18.3	Absence	0
1005	Lake Augusta 4	H	Deer	0	U	1150	4	16	0	0	20	1	0	0	18	64	0	1	0	68.9	0.07	16.6	-1.7	53.8	18.3	Absence	0
1006	Lake Augusta 4	H	Deer	0	U	1150	5	8	0	0	13	1	0	0	2	85	0	0	0	19.9	0.02	16.3	-1.7	53.8	18.3	Absence	0
1007	Lake Augusta 4	H	Deer	0	U	1150	7	8	9	0	15	1	0	0	0	75	0	1	0	64.2	0.04	16.3	-1.7	53.8	18.3	Absence	0
1008	Lake Augusta 4	H	Deer	0	U	1150	7	8	9	0	15	1	0	0	0	75	0	1	0	64.2	0.04	16.3	-1.7	53.8	18.3	Absence	0
1009	Little Pine Moorland 1	MSR	Deer	0	B	1015	9	79	10	5	88	2	6	0	0	3	0	0	0	12.7	0.04	17.4	-1.5	49	18.6	Absence	0
1011	Little Pine Moorland 1	MSR	Deer	0	B	1014	57	31	12	0	88	2	0	0	0	0	0	0	0	21.5	0.03	17.3	-1.5	49	18.6	Absence	0
1012	Little Pine Moorland 1	MSR	Deer	0	B	1013	56	29	7	0	85	2	4	0	0	0	0	2	0	19.4	0.04	14.4	-1.5	49	18.6	Absence	0
1013	Little Pine Moorland 1	MSR	Deer	0	B	1011	68	28	4	0	96	2	0	0	0	0	0	0	0	25.6	0.09	13.7	-1.5	49	18.6	Absence	0
1015	Little Pine Moorland 2	MSR	Deer	0	U	1009	40	0	0	0	40	2	0	0	60	0	0	0	0	52	0.09	11.1	-1.5	50.4	18.5	Absence	0
1016	Little Pine Moorland 2	MSR	Deer	0	U	1009	70	0	0	0	70	2	0	0	30	0	0	0	0	43.6	0.1	10.9	-1.5	50.4	18.5	Absence	0
1017	Little Pine Moorland 2	MSR	Deer	0	U	1005	85	3	0	0	88	2	0	0	15	0	0	0	0	32.9	0.07	10.7	-1.5	50.4	18.5	Absence	0
1019	Little Pine Moorland 2	MSR	Deer	0	U	1007	65	0	0	0	65	2	0	0	45	0	0	0	0	30.8	0.08	10.3	-1.5	50.4	18.5	Absence	0
1020	Little Pine Moorland 2	MSR	Deer	0	U	1005	61	0	4	0	61	2	0	0	35	0	0	0	0	11.1	0.05	10.1	-1.5	50.4	18.5	Absence	0
1021	Queensberry Track 1	MSR	Deer	0	B	145	0	0	10	0	0	2	0	0	10	0	10	0	80	46.5	0.02	14.6	3.6	58.9	21.7	Absence	0
1022	Queensberry Track 1	MSR	Deer	0	B	145	0	10	10	0	10	2	0	0	30	60	0	2	20	45.8	0.3	14.2	3.6	58.9	21.7	Absence	0
1023	Queensberry Track 1	MSR	Deer	0	B	144	0	7	10	0	7	1	0	0	75	8	0	11	30	60.3	0	13.6	3.6	58.9	21.7	Absence	0
1024	Queensberry Track 1	MSR	Deer	0	B	148	0	0	2	0	0	1	0	0	25	20	0	10	45	57.4	0.03	13.1	3.6	58.9	21.7	Absence	0
1025	Queensberry Track 1	MSR	Deer	0	B	148	0	3	10	0	3	1	0	0	65	3	0	1	30	50.2	0.02	12.7	3.6	58.9	21.7	Absence	0
1026	Queensberry Track 1	MSR	Deer	0	B	152	0	0	5	1	0	1	0	0	50	5	0	40	10	47.1	0.07	12.7	3.6	58.9	21.7	Absence	0
1027	Queensberry Track 2	MSR	Deer	0	U	149	0	2	0	0	2	2	0	0	70	30	0	2	0	53.2	0.1	12.2	3.6	59.3	21.6	Absence	0
1028	Queensberry Track 2	MSR	Deer	0	U	148	0	2	0	0	2	2	0	0	45	55	0	0	0	45.9	0.11	12.2	3.6	59.3	21.6	Absence	0
1029	Queensberry Track 2	MSR	Deer	0	U	149	0	1	0	0	1	2	0	0	75	25	0	0	0	36.7	0.04	12.2	3.6	59.3	21.6	Absence	0
1030	Queensberry Track 2	MSR	Deer	0	U	151	0	1	2	0	1	1	0	0	75	7	0	0	15	45.3	0.09	11.9	3.6	59.3	21.6	Absence	0
1031	Queensberry Track 2	MSR	Deer	0	U	150	0	8	2	0	8	1	0	0	40	40	0	15	0	44.1	0.22	12	3.6	59.3	21.6	Absence	0
1032	Queensberry Track 2	MSR	Deer	0	U	149	40	0	0	0	40	2	0	0	0	50	10	0	0	31.1	0.06	11.9	3.6	59.3	21.6	Absence	0
1033	Mt Zeehan 1	MSR	Deer	0	B	180	90	0	4	4	90	2	4	0	2	0	0	8	0	40.6	0	8.7	2.6	74.6	22	Absence	0
1035	Mt Zeehan 1	MSR	Deer	0	B	185	80	2	10	0	82	3	0	0	6	2	0	8	0	57.5	0.2	10.5	2.6	74.6	22	Absence	0
1036	Mt Zeehan 1	MSR	Deer	0	B	187	75	2	20	0	77	3	0	0	3	0	0	8	0	52.6	0.14	11.3	2.6	74.6	22	Absence	0
1039	Mt Zeehan 2	MSR	Deer	0	U	184	35	0	5	2	35	2	0	0	20	30	10	12	10	35.5	0.11	14	2.6	75.9	22.2	Absence	0
1040	Mt Zeehan 2	MSR	Deer	0	U	185	4	0	0	1	4	2	4	0	70	0	5	20	25	32.7	0.06	13.9	2.6	75.9	22.2	Absence	0
1041	Mt Zeehan 2	MSR	Deer	0	U	185	0	1	0	2	1	3	0	0	0	0	20	98	0	16.5	0	14.7	2.6	75.9	22.2	Absence	0
1042	Mt Zeehan 2	MSR	Deer	0	U	182	0	2	20	4	2	4	0	0	30	2	50	40	10	22.2	0.12	15.4	2.6	75.9	22.2	Absence	0
1043	Mt Zeehan 2	MSR	Deer	0	U	178	0	2	0	0	2	4	0	0	20	40	40	15	10	25.2	0.25	16.1	2.6	75.9	22.2	Absence	0
1044	Mt Zeehan 2	MSR	Deer	0	U	174	0	0	0	0	0	3	0	0	5	80	15	0	0	30.7	0.07	16.3	2.6	75.9	22.2	Absence	0
1045	Zeehan 3	MSR	Deer	0	B	235	0	2	50	0	2	2	3	0	44	3	0	2	0	44	0.07	17	4	50.3	21	Absence	0
1046	Zeehan 3	MSR	Deer	0	B	237	0	0	2	0	0	2	0	0	70	2	0	70	0	41.5	0.12	18.8	4	50.3	21	Absence	0
1047	Zeehan 3	MSR	Deer	0	B	236	0	0	20	0	0	2	10	0	35	5	0	30	0	43.3	0.1	17.7	4	50.3	21	Absence	0
1048	Zeehan 3	MSR	Deer	0	B	236	0	2	0	0	2	3	50	0	25	5	0	35	0	42	0.08	19.7	4	50.3	21	Absence	0
1049	Zeehan 3	MSR	Deer	0	B	238	0	0	5	0	0	4	3	0	60	8	0	60	0	48.7	0.05	20.1	4	50.3	21	Absence	0
1050	Zeehan 3	MSR	Deer	0	B	238	0	0	60	0	0	3	0	0	45	5	0	0	0	48.6	0.08	19.8	4	50.3	21	Absence	0
1051	Zeehan 4	MSR	Deer	0	U	211	0	0	0	0	0	2	0	0	60	60	0	0	0	50.4	0.02	16.5	4	49.1	21.4	Absence	0
1052	Zeehan 4	MSR	Deer	0	U	214	0	0	0	0	0	2	0	0	50	50	0	0	10	49.7	0.07	16.3	4	49.1	21.4	Absence	0
1053	Zeehan 4	MSR	Deer	0	U	217	0	10	0	0	10	2	0	0	40	50	0	2	5	38.5	0.02	16	4	49.1	21.4	Absence	0
1054	Zeehan 4	MSR	Deer	0	U	216	0	0	0	0	0	3	0	0	90	10	0	4	0	36.1	0.08	15.8	4	49.1	21.4	Absence	0
1055	Zeehan 4	MSR	Deer	0	U	218	0	0	0	0	0	4	0	0	90	0	0	0	10	59.3	0.13	16.1	4	49.1	21.4	Absence	0
1056	Zeehan 4	MSR	Deer	0	U	219	0	0	0	0	0	4	0	0	80	20	0	0	0	43.7	0.05	16.2	4	49.1	21.4	Absence	0
1057	Northern Grassland 1	G	Deer	0	B	669	95	20	0	0	115	1	0	0	0	0	0	2	0	38	0.18	9.1	0.1	45.3	19.8	Absence	0
1058	Northern Grassland 1	G	Deer	0	B	668	90	0	0	0	90	1	0	0	5	0	0	4	0	24.6	0.05	10.3	0.1	45.3	19.8	Absence	0
1060	Northern Grassland 1	G	Deer	0	B	669	94	12	0	0	106	1	0	0	0	0	0	2	0	16	0.06	11.7	0.1	45.3	19.8	Absence	0
1061	Northern Grassland 1	G	Deer	0	B	669	92	5	8	0	97	1	0	0	0	0	0	3	0	9.3	0	12.6	0.1	45.3	19.8	Absence	0
1062	Northern Grassland 1	G	Deer	0	B	669	98	5	0	0	103	1	0	0	0	0	0	1	0	27.2	0.09	13.1	0.1	45.3	19.8	Absence	0
1063	Northern Grassland 2	G	Deer	0	U	667	100	3	0	0	103	1	0	0	0	0	0	1	0	13.9	0.04	14.2	0.1	44.9	19.9	Absence	0
1064	Northern Grassland 2	G	Deer	0	U	667	100	3	0	0	103	1	0	0	0	0	0	1	0	11.8	0.02	15	0.1	44.9	19.9	Absence	0
1065	Northern Grassland 2	G	Deer	0	U	667	100	2	0	0	102	1	0	0	0	0	0	2	0	27.6	0.04	15.4	0.1	44.9	19.9	Absence	0
1066	Northern Grassland 2	G	Deer	0	U	671	97	2	0	0	99	1	0	0	3	0	0	0	0	23.2	0.03	15.5	0.1	44.9	19.9	Absence	0
1067	Northern Grassland 2	G	Deer	0	U	672	96	11	0	0	107	2	0	0	0	0	0	5	0	16.6	0.02	15.9	0.1	44.9	19.9	Absence	0
1068	Northern Grassland 2	G	Deer	0	U	669	97	3	0	0	100	1	0	0	2	0	0	2	0	11.3	0.05	19.4	0.1	44.9	19.9	Absence	0
1070	Grassland Hill 1	G	Deer	0	B	686	45	14	2	2	59	2	0	0	0	0	0	51	0	22.1	0.06	11.6	1.5	53.9	19.8	Absence	0
1071	Grassland Hill 1	G	Deer	0	B	689	75	2	5	0	77	2	0	0	0	1	0	24	0	10.3	0.09	16	1.5	53.9	19.8	Absence	0
1072	Grassland Hill 1	G	Deer	0	B	693	89	1	0	0	90	2	0	0	0	0	0	11	0	21.5	0.02	18.2	1.5	53.9	19.8	Absence	0
1073	Grassland Hill 1	G	Deer	0	B	692	33	51	0	4	84	2	0	0	0	0	0	12	0	18.2	0.03	19.5	1.5	53.9	19.8	Absence	0
1074	Grassland Hill 1	G	Deer	0	B	693	98	1	0	1	99	2	0	0	0	0	0	0	2	11.5	0.03	19	1.5	53.9	19.8	Absence	0
1075	Grassland Hill 2	G	Deer	0	U	641	96	78	2	0	174	1	0	0	0	0	0	0	0	19.9	0.04	18.2	1.5	43.8	20.1	Absence	0
1076	Grassland Hill 2	G	Deer	0	U	640	96	2	1	0	98	1	0	0	0	0	0	2	0	32.3	0.08	18.1	1.5	43.8	20.1	Absence	0
1077	Grassland Hill 2	G	Deer	0	U	640	64	2	15	0	66	1	0	0	0	0	0	18	3	21.2	0.05	18.2	1.5	43.8	20.1	Absence	0
1078	Grassland Hill 2	G	Deer	0	U	638	88	2	0	0	90	1	0	0	0	0	0	12	0	17.8	0.06	19.2	1.5	43.8	20.1	Absence	0
1105	RRiverRoad 3	WE	Deer	0	B	378	0	5	3	2	5	3	20	30	0	15	0	60	30	15.9	0.05	10.3	2.1	54.9	21.6	Absence	0
1106	RRiverRoad 3	WE	Deer	0	B	377	0	3	15	2	3	2	10	50	0	0	0	35	35	11.8	0	10.3	2.1	54.9	21.6	Absence	0
1107	RRiverRoad 3	WE	Deer	0	B	385	0	2	0	0	2	2	60	35	1	0	0	10	50	9.4	0.05	10.5	2.1	54.9	21.6	Absence	0
1108	RRiverRoad 3	WE	Deer	0	B	386	0	1	3	0	1	2	0	70	0	0	0	10	90	34.9	0.05	10.4	2.1	54.9	21.6	Absence	0
1109	RRiverRoad 3	WE	Deer	0	B	381	0	1	0	0	1	2	0	70	0	1	0	50	60	22.1	0.09	10.6	2.1	54.9	21.6	Absence	0
1110	RRiverRoad 3	WE	Deer	0	B	383	0	0	0	0	0	2	0	90	0	0	0	5	100	21	0.09	10.6	2.1	54.9	21.6	Absence	0
1111	RRiverRoad 2	WE	Deer	0	U	384	0	0	0	5	0	2	0	65	1	0	0	3	95	8.9	0	14.6	2.1	56.1	21.5	Absence	0
1112	RRiverRoad 2	WE	Deer	0	U	383	0	2	2	3	2	2	0	90	0	0	0	20	75	11.5	0.05	13.6	2.1	56.1	21.5	Absence	0
1113	RRiverRoad 2	WE	Deer	0	U	383	0	0	0	70	0	1	0	45	0	0	0	75	50	18.9	0.06	13.1	2.1	56.1	21.5	Absence	0
1114	RRiverRoad 2	WE	Deer	0	U	379	0	0	3	8	0	2	70	90	1	0	0	60	20	16.6	0.15	12.7	2.1	56.1	21.5	Absence	0
1115	RRiverRoad 2	WE	Deer	0	U	379	0	0	0	3	0	2	0	75	0	0	0	60	70	10.4	0.04	11.8	2.1	56.1	21.5	Absence	0
1116	RRiverRoad 2	WE	Deer	0	U	380	0	0	0	0	0	2	0	95	0	0	0	2	98	22.2	0.01	11	2.1	56.1	21.5	Absence	0
1117	Hartz 2	WE	Deer	0	B	303	0	2	0	0	2	2	22	30	2	7	6	75	55	19.3	0.11	8.6	3	51.2	21.7	Absence	0
1118	Hartz 2	WE	Deer	0	B	284	0	1	6	0	1	2	18	20	1	1	0	26	55	21.2	0.03	9.2	3	51.2	21.7	Absence	0
1119	Hartz 2	WE	Deer	0	B	285	0	1	9	4	1	2	0	45	0	0	0	5	11	17.4	0	9.4	3	51.2	21.7	Absence	0
1120	Hartz 2	WE	Deer	0	B	283	0	0	0	1	0	3	3	55	2	0	1	78	94	30.7	0.08	10	3	51.2	21.7	Absence	0
1121	Hartz 2	WE	Deer	0	B	290	0	3	0	0	3	2	40	45	0	0	0	23	40	6.9	0	10.4	3	51.2	21.7	Absence	0
1122	Hartz 2	WE	Deer	0	B	287	0	5	6	5	5	3	14	50	1	1	0	28	40	16.2	0.05	10.5	3	51.2	21.7	Absence	0
1123	Hartz 1	WE	Deer	0	U	313	0	0	0	0	0	3	3	80	0	0	2	3	96	24.4	0.03	9.6	3	53	21.7	Absence	0
1124	Hartz 1	WE	Deer	0	U	310	0	0	0	0	0	3	15	70	0	2	0	65	82	35.7	0.09	9.3	3	53	21.7	Absence	0
1125	Hartz 1	WE	Deer	0	U	311	0	0	0	0	0	2	6	80	0	0	0	9	100	10.6	0.06	9.1	3	53	21.7	Absence	0
1126	Hartz 1	WE	Deer	0	U	311	0	0	0	0	0	2	23	70	0	4	0	25	80	28.1	0.06	8.6	3	53	21.7	Absence	0
1127	Hartz 1	WE	Deer	0	U	306	0	0	0	0	0	2	5	65	0	0	0	2	100	26.1	0.03	8.5	3	53	21.7	Absence	0
1128	Hartz 1	WE	Deer	0	U	303	0	0	6	0	0	3	18	40	0	0	0	25	76	33.8	0.05	8.7	3	53	21.7	Absence	0
1129	Hartz 4	WE	Deer	0	B	166	0	1	0	0	1	3	0	50	0	3	8	12	90	7.1	0.1	10.6	3.4	57.7	22.2	Absence	0
1130	Hartz 4	WE	Deer	0	B	162	0	1	4	1	1	3	55	60	0	0	2	4	35	3.9	0.03	10.7	3.4	57.7	22.2	Absence	0
1131	Hartz 4	WE	Deer	0	B	159	0	0	5	0	0	4	22	50	0	1	1	38	40	2.2	0.02	10.9	3.4	57.7	22.2	Absence	0
1132	Hartz 4	WE	Deer	0	B	158	0	0	24	9	0	3	12	45	0	0	0	26	55	12.5	0.01	11.1	3.4	57.7	22.2	Absence	0
1133	Hartz 4	WE	Deer	0	B	157	0	0	2	0	0	3	3	50	0	0	0	3	94	3.7	0.04	11.1	3.4	57.7	22.2	Absence	0
1134	Hartz 4	WE	Deer	0	B	157	0	1	3	0	1	2	3	40	0	0	0	34	75	12.4	0.02	11.2	3.4	57.7	22.2	Absence	0
1135	Hartz 3	WE	Deer	0	U	275	0	0	16	1	0	2	3	40	0	2	0	81	45	6.9	0	11.7	3.4	62.5	20.8	Absence	0
1136	Hartz 3	WE	Deer	0	U	308	0	1	3	3	1	2	0	60	0	0	0	8	97	22.6	0.02	11.8	3.4	62.5	20.8	Absence	0
1137	Hartz 3	WE	Deer	0	U	300	0	0	3	9	0	3	9	60	0	0	0	17	81	5.5	0	11.6	3.4	62.5	20.8	Absence	0
1138	Hartz 3	WE	Deer	0	U	303	0	0	2	55	0	4	0	70	0	0	0	4	60	14.2	0	11.3	3.4	62.5	20.8	Absence	0
1139	Hartz 3	WE	Deer	0	U	316	0	0	0	0	0	3	0	50	100	0	0	0	0	15	0.03	11	3.4	62.5	20.8	Absence	0
1140	Hartz 3	WE	Deer	0	U	317	0	3	0	2	3	3	0	30	0	0	8	6	87	45.3	0.13	10.8	3.4	62.5	20.8	Absence	0
1141	Fingal 3	WE	Deer	0	B	813	0	5	2	15	5	2	0	40	0	6	0	2	85	14.6	0.01	12.4	1.3	82.5	19.3	Absence	0
1142	Fingal 3	WE	Deer	0	B	809	0	20	0	95	20	2	0	40	0	2	2	2	25	36.3	0.04	12.5	1.3	82.5	19.3	Absence	0
1143	Fingal 3	WE	Deer	0	B	807	2	3	0	10	5	3	0	10	0	5	0	0	86	14.1	0.02	12.7	1.3	82.5	19.3	Absence	0
1144	Fingal 3	WE	Deer	0	B	815	1	1	0	95	2	3	5	0	0	2	0	20	0	5.1	0.02	13.1	1.3	82.5	19.3	Absence	0
1145	Fingal 3	WE	Deer	0	B	814	0	4	0	35	4	3	60	40	0	2	0	2	5	17.8	0	13.3	1.3	82.5	19.3	Absence	0
1146	Fingal 3	WE	Deer	0	B	815	0	35	0	85	35	2	0	30	0	2	0	6	5	12.9	0	13.2	1.3	82.5	19.3	Absence	0
1147	Fingal 4	WE	Deer	0	U	802	1	4	0	3	5	2	5	45	0	0	0	1	97	15.6	0	13.7	1.3	82.5	19.3	Absence	0
1148	Fingal 4	WE	Deer	0	U	801	0	8	10	0	8	2	40	60	0	0	2	20	50	18.1	0	13.6	1.3	82.6	19.3	Absence	0
1149	Fingal 4	WE	Deer	0	U	800	0	0	0	0	0	2	2	65	0	0	94	0	4	36.3	0.08	12.8	1.3	82.6	19.3	Absence	0
1150	Fingal 4	WE	Deer	0	U	799	0	0	0	0	0	2	0	60	0	0	70	0	30	31.3	0.06	12.9	1.3	82.6	19.3	Absence	0
1151	Fingal 4	WE	Deer	0	U	794	0	3	0	1	3	2	5	50	0	0	5	3	97	19.2	0.06	12.8	1.3	82.6	19.3	Absence	0
1152	Fingal 4	WE	Deer	0	U	792	0	4	0	0	4	2	2	45	0	0	7	0	96	11.3	0.04	12.8	1.3	82.6	19.3	Absence	0
1153	Musselroe 1	SHC	Deer	0	B	6	2	3	9	0	5	2	0	0	65	21	0	1	0	10.5	0	14	5.1	37.7	22.2	Absence	0
1154	Musselroe 1	SHC	Deer	0	B	3	0	6	12	0	6	2	0	0	85	0	0	0	0	19.2	0.01	14.4	5.1	37.7	22.2	Absence	0
1155	Musselroe 1	SHC	Deer	0	B	2	0	12	10	0	12	2	0	0	78	2	0	1	0	23.2	0.04	16.5	5.1	37.7	22.2	Absence	0
1156	Musselroe 1	SHC	Deer	0	B	0	0	1	18	0	1	2	0	0	71	10	0	0	0	4.3	0	18.8	5.1	37.7	22.2	Absence	0
1157	Musselroe 1	SHC	Deer	0	B	1	0	2	30	0	2	2	0	0	70	0	0	0	0	14.6	0.02	19.5	5.1	37.7	22.2	Absence	0
1158	Musselroe 1	SHC	Deer	0	B	0	0	1	4	0	1	2	40	0	75	12	0	2	0	8.6	0.06	20.1	5.1	37.7	22.2	Absence	0
1159	Musselroe 2	SHC	Deer	0	U	3	0	4	0	0	4	2	0	0	84	12	0	2	0	19.6	0.01	21.7	5.1	37.3	22.3	Absence	0
1160	Musselroe 2	SHC	Deer	0	U	5	0	2	0	0	2	2	0	0	95	4	0	2	0	16.9	0.01	21.5	5.1	37.3	22.3	Absence	0
1161	Musselroe 2	SHC	Deer	0	U	6	0	4	0	0	4	2	0	0	70	30	0	0	0	17.6	0.03	21.3	5.1	37.3	22.3	Absence	0
1162	Musselroe 2	SHC	Deer	0	U	5	0	12	1	0	12	2	0	0	80	6	0	1	0	17.6	0	21.4	5.1	37.3	22.3	Absence	0
1163	Musselroe 2	SHC	Deer	0	U	5	0	5	0	0	5	2	0	0	65	30	0	1	0	17.7	0.01	21.6	5.1	37.3	22.3	Absence	0
1164	Musselroe 2	SHC	Deer	0	U	5	12	1	1	0	13	2	2	0	84	10	0	2	0	17.3	0	21.6	5.1	37.3	22.3	Absence	0
1165	Akaroa 1	SHC	Deer	0	B	21	0	2	20	0	2	1	0	0	80	2	0	0	10	6.2	0.02	13.1	5.5	50.3	21.7	Absence	0
1166	Akaroa 1	SHC	Deer	0	B	23	0	4	40	0	4	1	0	0	60	0	0	0	15	11	0	13.3	5.5	50.3	21.7	Absence	0
1167	Akaroa 1	SHC	Deer	0	B	24	0	2	40	0	2	1	2	0	40	2	0	0	25	8.3	0.07	13.8	5.5	50.3	21.7	Absence	0
1168	Akaroa 1	SHC	Deer	0	B	25	0	2	80	0	2	2	1	0	15	2	0	0	15	8.2	0	14.2	5.5	50.3	21.7	Absence	0
1169	Akaroa 1	SHC	Deer	0	B	23	0	2	70	0	2	2	0	0	35	0	0	0	2	4	0.02	14.5	5.5	50.3	21.7	Absence	0
1170	Akaroa 1	SHC	Deer	0	B	23	0	2	30	0	2	2	6	0	30	0	0	1	40	2.9	0	14.9	5.5	50.3	21.7	Absence	0
1171	Akaroa 2	SHC	Deer	0	U	19	0	10	2	0	10	1	0	0	30	55	5	1	0	4.3	0	15.6	5.5	50.6	21.7	Absence	0
1172	Akaroa 2	SHC	Deer	0	U	18	0	4	1	0	4	2	0	0	10	65	0	0	20	9.3	0.02	15.8	5.5	50.6	21.7	Absence	0
1173	Akaroa 2	SHC	Deer	0	U	16	5	2	2	0	7	2	0	0	25	50	20	2	40	7	0	16	5.5	50.6	21.7	Absence	0
1174	Akaroa 2	SHC	Deer	0	U	15	0	5	20	0	5	2	25	0	25	25	20	3	15	3.4	0	16.1	5.5	50.6	21.7	Absence	0
1175	Akaroa 2	SHC	Deer	0	U	15	0	0	1	0	0	2	0	0	5	65	20	1	15	3	0	16.3	5.5	50.6	21.7	Absence	0
1176	Akaroa 2	SHC	Deer	0	U	13	0	2	5	0	2	2	0	0	10	10	60	3	40	9.9	0.08	16.5	5.5	50.6	21.8	Absence	0
1177	Ida Bay 1	SHC	Deer	0	B	14	80	2	2	0	82	2	4	0	2	15	0	0	10	29.6	0.02	13.4	4.4	56.7	21.8	Absence	0
1178	Ida Bay 1	SHC	Deer	0	B	14	10	0	2	0	10	2	10	0	0	25	65	1	0	30	0.16	13.4	4.4	56.7	21.8	Absence	0
1179	Ida Bay 1	SHC	Deer	0	B	15	35	2	0	0	37	2	8	0	0	15	45	2	0	39.6	0.06	13.6	4.4	56.7	21.8	Absence	0
1180	Ida Bay 1	SHC	Deer	0	B	17	55	2	0	0	57	2	4	0	2	45	5	0	0	36.3	0.06	14.2	4.4	56.7	21.8	Absence	0
1181	Ida Bay 1	SHC	Deer	0	B	13	35	2	2	0	37	2	20	0	0	45	10	0	0	45.3	0.08	14.8	4.4	56.7	21.8	Absence	0
1182	Ida Bay 1	SHC	Deer	0	B	15	60	2	0	0	62	2	0	0	0	15	15	0	5	32.7	0.11	15.1	4.4	56.7	21.8	Absence	0
1183	Ida Bay 2	SHC	Deer	0	U	9	15	1	0	10	16	2	0	0	10	0	30	5	45	22.6	0	15.3	4.4	56.7	21.8	Absence	0
1184	Ida Bay 2	SHC	Deer	0	U	9	0	0	0	0	0	2	0	0	100	0	0	0	0	62.2	0.18	15.2	4.4	57.3	21.8	Absence	0
1185	Ida Bay 2	SHC	Deer	0	U	10	20	0	0	0	20	2	8	0	0	50	0	0	60	27.4	0	14.9	4.4	57.3	21.8	Absence	0
1186	Ida Bay 2	SHC	Deer	0	U	14	0	0	0	0	0	2	0	0	100	0	0	0	0	53.2	0.14	15	4.4	57.3	21.8	Absence	0
1187	Ida Bay 2	SHC	Deer	0	U	14	0	0	0	0	0	2	0	0	100	0	0	0	0	40.7	0.09	14.2	4.4	57.3	21.8	Absence	0
1188	Ida Bay 2	SHC	Deer	0	U	12	0	2	0	0	2	2	0	0	10	0	0	10	80	38.4	0.07	14.4	4.4	57.3	21.8	Absence	0
1189	Zeehan Coastal 1	SHC	Deer	0	B	207	0	1	15	0	1	2	0	0	75	10	0	4	0	38.9	0.01	16.8	3.5	50.3	21.3	Absence	0
1190	Zeehan Coastal 1	SHC	Deer	0	B	210	0	0	10	0	0	2	0	0	85	5	0	3	0	39	0.07	16.1	3.5	50.3	21.3	Absence	0
1191	Zeehan Coastal 1	SHC	Deer	0	B	213	0	0	15	0	0	2	0	0	80	1	0	10	0	48.3	0.03	15.9	3.5	50.3	21.3	Absence	0
1192	Zeehan Coastal 1	SHC	Deer	0	B	214	0	1	5	0	1	2	0	0	95	0	0	0	0	43.3	0	14.9	3.5	50.3	21.3	Absence	0
1193	Zeehan Coastal 1	SHC	Deer	0	B	212	0	1	1	0	1	2	0	0	98	2	0	8	0	44.7	0.02	14.8	3.5	50.3	21.3	Absence	0
1194	Zeehan Coastal 1	SHC	Deer	0	B	213	0	2	40	0	2	2	0	0	60	0	0	1	0	37.9	0.03	15	3.5	50.3	21.3	Absence	0
1195	Zeehan Coastal 2	SHC	Deer	0	U	231	0	2	0	0	2	2	0	0	98	2	0	1	10	47.6	0	19.5	3.5	52.3	20.9	Absence	0
1196	Zeehan Coastal 2	SHC	Deer	0	U	232	0	0	0	0	0	2	0	0	80	8	0	0	12	47.1	0.02	19.3	3.5	52.3	20.9	Absence	0
1197	Zeehan Coastal 2	SHC	Deer	0	U	236	0	0	0	0	0	2	0	0	40	55	0	0	15	41.9	0.09	18.8	3.5	52.3	20.9	Absence	0
1198	Zeehan Coastal 2	SHC	Deer	0	U	240	0	0	0	0	0	2	0	0	85	15	0	0	0	55	0	18.3	3.5	52.3	20.9	Absence	0
1199	Zeehan Coastal 2	SHC	Deer	0	U	241	0	0	0	0	0	2	0	0	95	5	0	0	5	42.3	0.07	18	3.5	52.3	20.9	Absence	0
1200	Zeehan Coastal 2	SHC	Deer	0	U	243	0	0	0	0	0	2	0	0	55	45	0	0	0	47.8	0.09	17.7	3.5	52.3	20.9	Absence	0
965	Little Pine Lagoon 1	H	Deer	1	B	1013	26	4	20	0	30	1	2	0	0	0	0	44	0	24.3	0.04	12.6	-1.3	46.2	18.7	Presence	1
1037	Mt Zeehan 1	MSR	Deer	1	B	192	20	0	45	10	20	4	0	0	20	5	0	4	0	35.3	0.14	12.3	2.6	74.6	22	Presence	1
961	Little Pine Lagoon 1	H	Deer	2	B	1014	62	3	17	0	65	1	0	0	0	0	0	18	0	32.9	0.07	11.7	-1.3	46.2	18.7	Presence	1
962	Little Pine Lagoon 1	H	Deer	2	B	1011	14	8	31	1	22	1	0	0	0	2	0	60	0	12.1	0	12.2	-1.3	46.2	18.7	Presence	1
966	Little Pine Lagoon 1	H	Deer	2	B	1011	8	7	25	0	15	1	4	0	0	0	0	56	0	20.6	0	12	-1.3	46.2	18.7	Presence	1
977	Lake Augusta 1	H	Deer	2	B	1147	16	7	0	0	23	1	48	0	0	0	0	27	0	44.7	0.08	9.5	-1.7	53.4	18.3	Presence	1
983	Lake Augusta 2	H	Deer	2	U	1162	5	0	23	71	5	2	0	0	0	0	0	1	0	15.1	0.02	11.4	-1.7	53	18.4	Presence	1
981	Lake Augusta 2	H	Deer	3	U	1160	38	0	14	47	38	1	0	0	0	0	0	1	0	15.8	0.02	12.1	-1.7	53	18.4	Presence	1
986	Liaweenee 1	H	Deer	3	B	1065	5	6	87	15	11	1	0	0	0	0	0	2	0	15.7	0.02	8.8	-1.5	47.1	18.5	Presence	1
996	Liaweenee 2	H	Deer	3	U	1064	24	5	63	63	29	1	0	0	0	0	0	5	3	22.2	0.04	4.8	-1.5	46.3	18.6	Presence	1
1003	Lake Augusta 4	H	Deer	3	U	1147	91	0	0	0	91	1	0	0	0	9	0	15	0	49.9	0.02	17.1	-1.7	53.8	18.3	Presence	1
1010	Little Pine Moorland 1	MSR	Deer	4	B	1015	56	50	2	0	106	2	0	0	0	0	0	0	0	16	0	17.1	-1.5	49	18.6	Presence	1
1038	Mt Zeehan 1	MSR	Deer	4	B	194	4	1	0	85	5	4	0	0	0	10	0	0	0	18	0.05	12.8	2.6	74.6	22	Presence	1
914	Five Rivers 2	DE	Deer	5	B	816	35	10	3	50	45	1	0	0	0	0	0	2	0	28.9	0.05	17.2	-0.2	49.9	19.3	Presence	1
995	Liaweenee 2	H	Deer	5	U	1065	4	6	0	0	10	1	0	0	0	52	0	48	0	12.3	0.06	5	-1.5	46.3	18.6	Presence	1
1014	Little Pine Moorland 1	MSR	Deer	5	B	1012	21	33	46	0	54	1	0	0	0	0	0	0	0	12.4	0.04	13.1	-1.5	49	18.6	Presence	1
1034	Mt Zeehan 1	MSR	Deer	5	B	186	30	0	40	15	30	3	0	0	0	2	0	25	0	47.5	0.2	9.5	2.6	74.6	22	Presence	1
960	Five Rivers 4	H	Deer	6	U	820	55	15	1	0	70	2	0	50	3	8	0	3	20	5.3	0.01	14.2	-0.4	50.8	19.5	Presence	1
967	Little Pine Lagoon 2	H	Deer	6	U	1014	9	2	0	0	11	1	0	0	0	83	0	6	0	30.4	0.04	13.7	-1.3	46.3	18.7	Presence	1
987	Liaweenee 1	H	Deer	7	B	1066	74	9	16	8	83	1	2	0	0	0	0	5	0	11	0.02	8.5	-1.5	47.1	18.5	Presence	1
991	Liaweenee 2	H	Deer	7	U	1064	14	5	0	0	19	1	0	0	0	75	0	6	0	14.2	0.05	5.7	-1.5	46.3	18.6	Presence	1
1069	Grassland Hill 1	G	Deer	7	B	686	46	50	0	2	96	2	0	0	0	0	4	40	0	14.4	0.03	9.8	1.5	53.9	19.8	Presence	1
931	Euc Home 2	DE	Deer	8	U	651	65	4	0	0	69	2	0	50	0	4	0	5	30	12.9	0.04	7	0.7	49.6	19.8	Presence	1
1018	Little Pine Moorland 2	MSR	Deer	8	U	1006	90	0	0	0	90	2	0	0	10	0	0	0	0	29	0.12	10.5	-1.5	50.4	18.5	Presence	1
963	Little Pine Lagoon 1	H	Deer	9	B	1011	15	15	20	3	30	1	4	0	2	0	0	41	0	19.5	0.04	12.7	-1.3	46.2	18.7	Presence	1
1059	Northern Grassland 1	G	Deer	10	B	670	90	11	0	0	101	1	0	0	2	0	2	2	0	37.3	0.08	10.8	0.1	45.3	19.8	Presence	1
936	Euc Home 2	DE	Deer	12	U	649	22	2	0	0	24	2	8	50	0	5	0	1	82	16	0.05	8.3	0.7	49.6	19.8	Presence	1
916	Five Rivers 2	DE	Deer	13	B	818	3	20	30	20	23	2	0	0	0	0	0	8	20	11.2	0	15.9	-0.2	49.9	19.3	Presence	1
994	Liaweenee 2	H	Deer	13	U	1065	27	6	0	0	33	1	0	0	0	0	0	73	0	17.7	0.06	5.3	-1.5	46.3	18.6	Presence	1
930	Euc Home 1	DE	Deer	15	B	647	6	1	2	7	7	2	2	55	0	3	0	22	86	10.3	0.07	10.7	0.7	48.7	20	Presence	1
1080	Grassland Hill 2	G	Deer	22	U	639	83	5	2	0	88	2	0	0	0	0	0	10	0	16.3	0.04	18.8	1.5	43.8	20.1	Presence	1
959	Five Rivers 4	H	Deer	26	U	818	40	5	0	45	45	1	0	40	0	0	0	10	20	8.9	0.02	14.2	-0.4	50.8	19.5	Presence	1
985	Liaweenee 1	H	Deer	26	B	1061	57	17	21	3	74	1	0	0	0	0	0	2	0	18.2	0.03	10.8	-1.5	47.1	18.5	Presence	1
1079	Grassland Hill 2	G	Deer	27	U	636	100	1	0	0	101	1	0	0	0	0	0	3	0	17.6	0.06	19	1.5	43.8	20.1	Presence	1
988	Liaweenee 1	H	Deer	101	B	1065	19	4	65	18	23	1	0	0	0	1	0	0	0	22.2	0.06	7.6	-1.5	47.1	18.5	Presence	1

## Sheet: Rabbit
Number	Location	TASVEG	Herbivore	Scat	Fire	Elevation	Grass	Herb	Bare	Rock	Fodder	Slope	CWD	Canopy	Sedge	Shrub	Fern	Moss	Litter	SoilM	SoilC	SoilT	MinJuly	MARfeb	Maxjan	Scatclass	Scatclass2
601	Sunny Hills 1	DE	Rabbit	0	B	171	0	1	2	0	1	3	5	55	0	0	7	2	95	6.8	0.04	13.5	3.6	56.1	21.7	Absence	0
602	Sunny Hills 1	DE	Rabbit	0	B	168	0	2	35	0	2	3	0	55	0	0	35	0	65	7	0.08	13.8	3.6	56.1	21.7	Absence	0
603	Sunny Hills 1	DE	Rabbit	0	B	171	0	1	75	2	1	4	3	30	0	0	10	5	20	4.3	0.02	14	3.6	56.1	21.7	Absence	0
604	Sunny Hills 1	DE	Rabbit	0	B	178	0	1	30	2	1	4	0	55	2	0	6	0	70	9.1	0.02	14.2	3.6	56.1	21.7	Absence	0
605	Sunny Hills 1	DE	Rabbit	0	B	179	4	2	40	1	6	4	15	40	5	0	0	0	40	14.2	0	14.3	3.6	56.1	21.7	Absence	0
606	Sunny Hills 1	DE	Rabbit	0	B	177	0	2	30	35	2	4	0	20	15	0	4	20	30	6.5	0.02	14.3	3.6	56.1	21.7	Absence	0
607	Sunny Hills 2	DE	Rabbit	0	U	171	0	2	10	0	2	2	20	30	2	0	2	4	70	9.6	0.1	14.5	3.6	56.4	21.7	Absence	0
608	Sunny Hills 2	DE	Rabbit	0	U	175	0	0	40	0	0	3	0	70	2	0	3	0	60	4.8	0.01	14.3	3.6	56.4	21.7	Absence	0
609	Sunny Hills 2	DE	Rabbit	0	U	174	0	0	0	0	0	3	0	10	2	0	70	10	50	6.2	0	14.4	3.6	56.4	21.7	Absence	0
610	Sunny Hills 2	DE	Rabbit	0	U	170	0	0	0	0	0	3	0	70	3	0	30	0	70	11	0	15.1	3.6	56.4	21.7	Absence	0
611	Sunny Hills 2	DE	Rabbit	0	U	175	0	0	8	0	0	3	0	60	4	0	5	0	90	6	0	15.9	3.6	56.4	21.7	Absence	0
612	Sunny Hills 2	DE	Rabbit	0	U	174	0	3	0	0	3	2	0	10	3	0	5	35	60	10	0	16.3	3.6	56.4	21.7	Absence	0
614	Five Rivers 2	DE	Rabbit	0	B	816	35	10	3	50	45	1	0	0	0	0	0	2	0	28.9	0.05	17.2	-0.2	49.9	19.3	Absence	0
615	Five Rivers 2	DE	Rabbit	0	B	821	10	65	12	5	75	1	0	0	0	0	0	3	5	5	0.02	17.3	-0.2	49.9	19.3	Absence	0
616	Five Rivers 2	DE	Rabbit	0	B	818	3	20	30	20	23	2	0	0	0	0	0	8	20	11.2	0	15.9	-0.2	49.9	19.3	Absence	0
619	Five Rivers 1	DE	Rabbit	0	U	864	15	12	1	2	27	1	0	50	2	0	0	2	70	8.3	0.02	15.8	-0.2	59.5	19	Absence	0
620	Five Rivers 1	DE	Rabbit	0	U	856	30	15	1	0	45	1	0	30	0	25	0	2	50	6	0	15.6	-0.2	59.5	19	Absence	0
621	Five Rivers 1	DE	Rabbit	0	U	858	6	3	3	2	9	1	0	30	6	50	0	10	40	4.9	0	15.5	-0.2	59.5	19	Absence	0
622	Five Rivers 1	DE	Rabbit	0	U	853	5	5	2	0	10	1	0	0	0	50	0	30	30	12.5	0.02	14.7	-0.2	59.5	19	Absence	0
623	Five Rivers 1	DE	Rabbit	0	U	853	55	25	3	2	80	1	10	0	0	20	0	5	10	6.4	0.07	14.4	-0.2	59.5	19	Absence	0
624	Five Rivers 1	DE	Rabbit	0	U	850	90	6	0	0	96	2	0	40	0	0	0	1	30	6.6	0.05	13.4	-0.2	59.5	19	Absence	0
625	Euc Home 1	DE	Rabbit	0	B	643	5	6	1	17	11	3	3	45	0	18	0	13	60	8.1	0	13.9	0.7	48.7	20	Absence	0
626	Euc Home 1	DE	Rabbit	0	B	646	2	3	0	2	5	2	4	55	5	2	0	7	96	7.1	0.07	12.9	0.7	48.7	20	Absence	0
627	Euc Home 1	DE	Rabbit	0	B	643	1	1	0	1	2	2	0	55	0	86	0	1	55	8.2	0.12	12.2	0.7	48.7	20	Absence	0
628	Euc Home 1	DE	Rabbit	0	B	644	1	2	0	0	3	2	4	20	5	14	0	5	98	15.4	0.08	11.7	0.7	48.7	20	Absence	0
629	Euc Home 1	DE	Rabbit	0	B	643	2	2	1	82	4	2	0	55	0	3	0	80	17	5.2	0.05	10.9	0.7	48.7	20	Absence	0
630	Euc Home 1	DE	Rabbit	0	B	647	6	1	2	7	7	2	2	55	0	3	0	22	86	10.3	0.07	10.7	0.7	48.7	20	Absence	0
631	Euc Home 2	DE	Rabbit	0	U	651	65	4	0	0	69	2	0	50	0	4	0	5	30	12.9	0.04	7	0.7	49.6	19.8	Absence	0
632	Euc Home 2	DE	Rabbit	0	U	652	86	2	0	0	88	2	0	0	0	9	0	7	13	7.7	0.03	7.1	0.7	49.6	19.8	Absence	0
633	Euc Home 2	DE	Rabbit	0	U	644	4	0	0	0	4	2	0	60	0	100	0	0	30	16.9	0.1	7.1	0.7	49.6	19.8	Absence	0
634	Euc Home 2	DE	Rabbit	0	U	644	94	4	0	0	98	2	0	60	0	0	0	2	20	16.4	0.04	7.2	0.7	49.6	19.8	Absence	0
635	Euc Home 2	DE	Rabbit	0	U	650	4	0	0	0	4	2	0	55	0	100	0	0	6	7.9	0.03	8.2	0.7	49.6	19.8	Absence	0
636	Euc Home 2	DE	Rabbit	0	U	649	22	2	0	0	24	2	8	50	0	5	0	1	82	16	0.05	8.3	0.7	49.6	19.8	Absence	0
637	Fingal 1	DE	Rabbit	0	B	454	60	11	15	5	71	2	1	0	5	0	0	1	2	39.4	0.03	11.5	2.2	55.5	22.2	Absence	0
638	Fingal 1	DE	Rabbit	0	B	456	15	6	50	25	21	2	0	0	2	0	0	2	2	26	0.12	11.6	2.2	55.5	22.2	Absence	0
639	Fingal 1	DE	Rabbit	0	B	460	0	6	10	50	6	3	0	0	40	0	0	4	1	23.5	0.09	11.9	2.2	55.5	22.2	Absence	0
640	Fingal 1	DE	Rabbit	0	B	463	0	1	3	20	1	2	4	30	3	2	0	1	85	16.5	0.05	12.5	2.2	55.5	22.2	Absence	0
641	Fingal 1	DE	Rabbit	0	B	457	4	3	6	30	7	2	2	50	0	2	0	3	65	17.6	0.07	13	2.2	55.5	22.2	Absence	0
642	Fingal 1	DE	Rabbit	0	B	456	65	3	4	4	68	3	10	40	12	0	0	1	5	31.7	0.13	13.2	2.2	55.5	22.2	Absence	0
643	Fingal 2	DE	Rabbit	0	U	432	80	5	0	0	85	2	6	10	10	0	0	2	0	15.1	0	10.8	2.2	49.5	22.3	Absence	0
644	Fingal 2	DE	Rabbit	0	U	433	3	2	0	0	5	2	0	10	85	0	0	6	6	24.2	0.05	10.9	2.2	49.5	22.3	Absence	0
645	Fingal 2	DE	Rabbit	0	U	430	65	4	2	0	69	2	4	40	12	0	0	4	10	14.1	0	11.2	2.2	49.5	22.3	Absence	0
646	Fingal 2	DE	Rabbit	0	U	432	81	4	0	0	85	2	6	55	8	0	0	1	50	6.5	0.08	11.3	2.2	49.5	22.3	Absence	0
647	Fingal 2	DE	Rabbit	0	U	431	9	0	0	0	9	2	80	45	2	0	0	0	90	19.1	0.04	11.5	2.2	49.5	22.3	Absence	0
648	Fingal 2	DE	Rabbit	0	U	434	0	3	0	1	3	2	4	30	95	0	0	3	6	19.6	0.05	11.5	2.2	49.5	22.3	Absence	0
649	Five Rivers 3	H	Rabbit	0	B	815	35	2	30	6	37	1	2	50	0	0	0	2	38	27.2	0.05	12.7	-0.4	50.7	19.4	Absence	0
650	Five Rivers 3	H	Rabbit	0	B	815	40	30	0	25	70	1	0	10	0	0	0	2	25	23.5	0.07	12.8	-0.4	50.7	19.4	Absence	0
654	Five Rivers 3	H	Rabbit	0	B	812	5	80	0	0	85	1	0	0	0	0	0	15	3	13.2	0	13.7	-0.4	50.7	19.4	Absence	0
655	Five Rivers 4	H	Rabbit	0	U	815	80	3	0	0	83	1	0	0	0	0	0	17	0	8.7	0	13	-0.4	50.8	19.5	Absence	0
656	Five Rivers 4	H	Rabbit	0	U	817	92	8	0	0	100	1	0	0	0	0	0	0	0	7.1	0.07	13	-0.4	50.8	19.5	Absence	0
657	Five Rivers 4	H	Rabbit	0	U	817	17	20	1	2	37	1	0	0	0	60	0	1	0	8.3	0.08	14.2	-0.4	50.8	19.5	Absence	0
658	Five Rivers 4	H	Rabbit	0	U	817	6	6	0	0	12	1	0	0	0	88	0	0	0	11.2	0.03	14.2	-0.4	50.8	19.5	Absence	0
659	Five Rivers 4	H	Rabbit	0	U	818	40	5	0	45	45	1	0	40	0	0	0	10	20	8.9	0.02	14.2	-0.4	50.8	19.5	Absence	0
660	Five Rivers 4	H	Rabbit	0	U	820	55	15	1	0	70	2	0	50	3	8	0	3	20	5.3	0.01	14.2	-0.4	50.8	19.5	Absence	0
661	Little Pine Lagoon 1	H	Rabbit	0	B	1014	62	3	17	0	65	1	0	0	0	0	0	18	0	32.9	0.07	11.7	-1.3	46.2	18.7	Absence	0
664	Little Pine Lagoon 1	H	Rabbit	0	B	1012	3	22	18	6	25	1	7	0	0	0	0	60	0	20.7	0.05	12.5	-1.3	46.2	18.7	Absence	0
667	Little Pine Lagoon 2	H	Rabbit	0	U	1014	9	2	0	0	11	1	0	0	0	83	0	6	0	30.4	0.04	13.7	-1.3	46.3	18.7	Absence	0
668	Little Pine Lagoon 2	H	Rabbit	0	U	1015	36	21	8	0	57	1	0	0	0	26	0	9	0	29.5	0.05	13.2	-1.3	46.3	18.7	Absence	0
669	Little Pine Lagoon 2	H	Rabbit	0	U	1014	16	2	0	0	18	1	0	0	0	79	0	3	0	19.2	0.06	13.2	-1.3	46.3	18.7	Absence	0
670	Little Pine Lagoon 2	H	Rabbit	0	U	1016	1	1	0	0	2	1	0	0	0	97	0	1	0	17.4	0.05	14.3	-1.3	46.3	18.7	Absence	0
671	Little Pine Lagoon 2	H	Rabbit	0	U	1020	0	2	0	0	2	1	0	0	0	90	0	6	2	21.8	0	15.2	-1.3	46.3	18.7	Absence	0
672	Little Pine Lagoon 2	H	Rabbit	0	U	1021	0	0	0	0	0	1	0	0	0	100	0	0	0	11.3	0.04	15.2	-1.3	46.3	18.7	Absence	0
676	Lake Augusta 1	H	Rabbit	0	B	1148	46	48	0	0	94	1	0	0	0	6	0	0	0	10.7	0.05	6.4	-1.7	53.4	18.3	Absence	0
677	Lake Augusta 1	H	Rabbit	0	B	1147	16	7	0	0	23	1	48	0	0	0	0	27	0	44.7	0.08	9.5	-1.7	53.4	18.3	Absence	0
678	Lake Augusta 1	H	Rabbit	0	B	1149	4	4	7	0	8	1	6	0	0	0	0	79	0	48.6	0.04	9.5	-1.7	53.4	18.3	Absence	0
681	Lake Augusta 2	H	Rabbit	0	U	1160	38	0	14	47	38	1	0	0	0	0	0	1	0	15.8	0.02	12.1	-1.7	53	18.4	Absence	0
682	Lake Augusta 2	H	Rabbit	0	U	1161	0	0	3	97	0	1	0	0	0	0	0	0	0	5.7	0.02	11.4	-1.7	53	18.4	Absence	0
683	Lake Augusta 2	H	Rabbit	0	U	1162	5	0	23	71	5	2	0	0	0	0	0	1	0	15.1	0.02	11.4	-1.7	53	18.4	Absence	0
684	Lake Augusta 2	H	Rabbit	0	U	1164	0	8	25	12	8	2	0	0	0	52	0	3	0	24.2	0.06	11.3	-1.7	53	18.4	Absence	0
685	Liaweenee 1	H	Rabbit	0	B	1061	57	17	21	3	74	1	0	0	0	0	0	2	0	18.2	0.03	10.8	-1.5	47.1	18.5	Absence	0
689	Liaweenee 1	H	Rabbit	0	B	1068	4	12	55	45	16	1	0	0	0	0	0	3	0	18.1	0.04	6.9	-1.5	47.1	18.5	Absence	0
690	Liaweenee 1	H	Rabbit	0	B	1067	0	3	90	90	3	1	0	0	0	0	0	0	0	26	0.05	6.3	-1.5	47.1	18.5	Absence	0
691	Liaweenee 2	H	Rabbit	0	U	1064	14	5	0	0	19	1	0	0	0	75	0	6	0	14.2	0.05	5.7	-1.5	46.3	18.6	Absence	0
692	Liaweenee 2	H	Rabbit	0	U	1066	62	4	8	5	66	1	0	0	0	0	0	21	0	25	0.06	5.6	-1.5	46.3	18.6	Absence	0
693	Liaweenee 2	H	Rabbit	0	U	1065	7	2	88	78	9	1	0	0	0	0	0	2	2	31.5	0.05	5.3	-1.5	46.3	18.6	Absence	0
694	Liaweenee 2	H	Rabbit	0	U	1065	27	6	0	0	33	1	0	0	0	0	0	73	0	17.7	0.06	5.3	-1.5	46.3	18.6	Absence	0
695	Liaweenee 2	H	Rabbit	0	U	1065	4	6	0	0	10	1	0	0	0	52	0	48	0	12.3	0.06	5	-1.5	46.3	18.6	Absence	0
697	Lake Augusta 3	H	Rabbit	0	B	1149	2	1	1	0	3	1	0	0	0	0	0	97	0	53.2	0.04	15.9	-1.7	53.7	18.3	Absence	0
698	Lake Augusta 3	H	Rabbit	0	B	1149	5	2	1	0	7	1	0	0	0	0	0	92	0	58.9	0.08	16.9	-1.7	53.7	18.3	Absence	0
699	Lake Augusta 3	H	Rabbit	0	B	1149	17	38	21	0	55	1	2	0	0	0	0	22	0	65.8	0.05	17	-1.7	53.7	18.3	Absence	0
700	Lake Augusta 3	H	Rabbit	0	B	1148	6	58	9	0	64	1	8	0	0	0	0	22	0	70.1	0.18	19.9	-1.7	53.7	18.3	Absence	0
701	Lake Augusta 3	H	Rabbit	0	B	1147	7	54	4	0	61	1	11	0	0	0	0	24	0	67.1	0.08	18.8	-1.7	53.7	18.3	Absence	0
702	Lake Augusta 3	H	Rabbit	0	B	1147	28	90	0	0	118	1	0	0	0	6	0	22	0	56.6	0.03	18.2	-1.7	53.7	18.3	Absence	0
703	Lake Augusta 4	H	Rabbit	0	U	1147	91	0	0	0	91	1	0	0	0	9	0	15	0	49.9	0.02	17.1	-1.7	53.8	18.3	Absence	0
704	Lake Augusta 4	H	Rabbit	0	U	1150	12	18	6	0	30	1	0	0	40	18	0	16	0	68.9	0.06	17.5	-1.7	53.8	18.3	Absence	0
705	Lake Augusta 4	H	Rabbit	0	U	1150	4	16	0	0	20	1	0	0	18	64	0	1	0	68.9	0.07	16.6	-1.7	53.8	18.3	Absence	0
706	Lake Augusta 4	H	Rabbit	0	U	1150	5	8	0	0	13	1	0	0	2	85	0	0	0	19.9	0.02	16.3	-1.7	53.8	18.3	Absence	0
707	Lake Augusta 4	H	Rabbit	0	U	1150	7	8	9	0	15	1	0	0	0	75	0	1	0	64.2	0.04	16.3	-1.7	53.8	18.3	Absence	0
708	Lake Augusta 4	H	Rabbit	0	U	1150	7	8	9	0	15	1	0	0	0	75	0	1	0	64.2	0.04	16.3	-1.7	53.8	18.3	Absence	0
709	Little Pine Moorland 1	MSR	Rabbit	0	B	1015	9	79	10	5	88	2	6	0	0	3	0	0	0	12.7	0.04	17.4	-1.5	49	18.6	Absence	0
710	Little Pine Moorland 1	MSR	Rabbit	0	B	1015	56	50	2	0	106	2	0	0	0	0	0	0	0	16	0	17.1	-1.5	49	18.6	Absence	0
712	Little Pine Moorland 1	MSR	Rabbit	0	B	1013	56	29	7	0	85	2	4	0	0	0	0	2	0	19.4	0.04	14.4	-1.5	49	18.6	Absence	0
713	Little Pine Moorland 1	MSR	Rabbit	0	B	1011	68	28	4	0	96	2	0	0	0	0	0	0	0	25.6	0.09	13.7	-1.5	49	18.6	Absence	0
715	Little Pine Moorland 2	MSR	Rabbit	0	U	1009	40	0	0	0	40	2	0	0	60	0	0	0	0	52	0.09	11.1	-1.5	50.4	18.5	Absence	0
716	Little Pine Moorland 2	MSR	Rabbit	0	U	1009	70	0	0	0	70	2	0	0	30	0	0	0	0	43.6	0.1	10.9	-1.5	50.4	18.5	Absence	0
717	Little Pine Moorland 2	MSR	Rabbit	0	U	1005	85	3	0	0	88	2	0	0	15	0	0	0	0	32.9	0.07	10.7	-1.5	50.4	18.5	Absence	0
718	Little Pine Moorland 2	MSR	Rabbit	0	U	1006	90	0	0	0	90	2	0	0	10	0	0	0	0	29	0.12	10.5	-1.5	50.4	18.5	Absence	0
719	Little Pine Moorland 2	MSR	Rabbit	0	U	1007	65	0	0	0	65	2	0	0	45	0	0	0	0	30.8	0.08	10.3	-1.5	50.4	18.5	Absence	0
720	Little Pine Moorland 2	MSR	Rabbit	0	U	1005	61	0	4	0	61	2	0	0	35	0	0	0	0	11.1	0.05	10.1	-1.5	50.4	18.5	Absence	0
721	Queensberry Track 1	MSR	Rabbit	0	B	145	0	0	10	0	0	2	0	0	10	0	10	0	80	46.5	0.02	14.6	3.6	58.9	21.7	Absence	0
722	Queensberry Track 1	MSR	Rabbit	0	B	145	0	10	10	0	10	2	0	0	30	60	0	2	20	45.8	0.3	14.2	3.6	58.9	21.7	Absence	0
723	Queensberry Track 1	MSR	Rabbit	0	B	144	0	7	10	0	7	1	0	0	75	8	0	11	30	60.3	0	13.6	3.6	58.9	21.7	Absence	0
724	Queensberry Track 1	MSR	Rabbit	0	B	148	0	0	2	0	0	1	0	0	25	20	0	10	45	57.4	0.03	13.1	3.6	58.9	21.7	Absence	0
725	Queensberry Track 1	MSR	Rabbit	0	B	148	0	3	10	0	3	1	0	0	65	3	0	1	30	50.2	0.02	12.7	3.6	58.9	21.7	Absence	0
726	Queensberry Track 1	MSR	Rabbit	0	B	152	0	0	5	1	0	1	0	0	50	5	0	40	10	47.1	0.07	12.7	3.6	58.9	21.7	Absence	0
727	Queensberry Track 2	MSR	Rabbit	0	U	149	0	2	0	0	2	2	0	0	70	30	0	2	0	53.2	0.1	12.2	3.6	59.3	21.6	Absence	0
728	Queensberry Track 2	MSR	Rabbit	0	U	148	0	2	0	0	2	2	0	0	45	55	0	0	0	45.9	0.11	12.2	3.6	59.3	21.6	Absence	0
729	Queensberry Track 2	MSR	Rabbit	0	U	149	0	1	0	0	1	2	0	0	75	25	0	0	0	36.7	0.04	12.2	3.6	59.3	21.6	Absence	0
730	Queensberry Track 2	MSR	Rabbit	0	U	151	0	1	2	0	1	1	0	0	75	7	0	0	15	45.3	0.09	11.9	3.6	59.3	21.6	Absence	0
731	Queensberry Track 2	MSR	Rabbit	0	U	150	0	8	2	0	8	1	0	0	40	40	0	15	0	44.1	0.22	12	3.6	59.3	21.6	Absence	0
732	Queensberry Track 2	MSR	Rabbit	0	U	149	40	0	0	0	40	2	0	0	0	50	10	0	0	31.1	0.06	11.9	3.6	59.3	21.6	Absence	0
733	Mt Zeehan 1	MSR	Rabbit	0	B	180	90	0	4	4	90	2	4	0	2	0	0	8	0	40.6	0	8.7	2.6	74.6	22	Absence	0
735	Mt Zeehan 1	MSR	Rabbit	0	B	185	80	2	10	0	82	3	0	0	6	2	0	8	0	57.5	0.2	10.5	2.6	74.6	22	Absence	0
736	Mt Zeehan 1	MSR	Rabbit	0	B	187	75	2	20	0	77	3	0	0	3	0	0	8	0	52.6	0.14	11.3	2.6	74.6	22	Absence	0
738	Mt Zeehan 1	MSR	Rabbit	0	B	194	4	1	0	85	5	4	0	0	0	10	0	0	0	18	0.05	12.8	2.6	74.6	22	Absence	0
739	Mt Zeehan 2	MSR	Rabbit	0	U	184	35	0	5	2	35	2	0	0	20	30	10	12	10	35.5	0.11	14	2.6	75.9	22.2	Absence	0
740	Mt Zeehan 2	MSR	Rabbit	0	U	185	4	0	0	1	4	2	4	0	70	0	5	20	25	32.7	0.06	13.9	2.6	75.9	22.2	Absence	0
741	Mt Zeehan 2	MSR	Rabbit	0	U	185	0	1	0	2	1	3	0	0	0	0	20	98	0	16.5	0	14.7	2.6	75.9	22.2	Absence	0
743	Mt Zeehan 2	MSR	Rabbit	0	U	178	0	2	0	0	2	4	0	0	20	40	40	15	10	25.2	0.25	16.1	2.6	75.9	22.2	Absence	0
744	Mt Zeehan 2	MSR	Rabbit	0	U	174	0	0	0	0	0	3	0	0	5	80	15	0	0	30.7	0.07	16.3	2.6	75.9	22.2	Absence	0
745	Zeehan 3	MSR	Rabbit	0	B	235	0	2	50	0	2	2	3	0	44	3	0	2	0	44	0.07	17	4	50.3	21	Absence	0
746	Zeehan 3	MSR	Rabbit	0	B	237	0	0	2	0	0	2	0	0	70	2	0	70	0	41.5	0.12	18.8	4	50.3	21	Absence	0
747	Zeehan 3	MSR	Rabbit	0	B	236	0	0	20	0	0	2	10	0	35	5	0	30	0	43.3	0.1	17.7	4	50.3	21	Absence	0
748	Zeehan 3	MSR	Rabbit	0	B	236	0	2	0	0	2	3	50	0	25	5	0	35	0	42	0.08	19.7	4	50.3	21	Absence	0
749	Zeehan 3	MSR	Rabbit	0	B	238	0	0	5	0	0	4	3	0	60	8	0	60	0	48.7	0.05	20.1	4	50.3	21	Absence	0
750	Zeehan 3	MSR	Rabbit	0	B	238	0	0	60	0	0	3	0	0	45	5	0	0	0	48.6	0.08	19.8	4	50.3	21	Absence	0
751	Zeehan 4	MSR	Rabbit	0	U	211	0	0	0	0	0	2	0	0	60	60	0	0	0	50.4	0.02	16.5	4	49.1	21.4	Absence	0
752	Zeehan 4	MSR	Rabbit	0	U	214	0	0	0	0	0	2	0	0	50	50	0	0	10	49.7	0.07	16.3	4	49.1	21.4	Absence	0
753	Zeehan 4	MSR	Rabbit	0	U	217	0	10	0	0	10	2	0	0	40	50	0	2	5	38.5	0.02	16	4	49.1	21.4	Absence	0
754	Zeehan 4	MSR	Rabbit	0	U	216	0	0	0	0	0	3	0	0	90	10	0	4	0	36.1	0.08	15.8	4	49.1	21.4	Absence	0
755	Zeehan 4	MSR	Rabbit	0	U	218	0	0	0	0	0	4	0	0	90	0	0	0	10	59.3	0.13	16.1	4	49.1	21.4	Absence	0
756	Zeehan 4	MSR	Rabbit	0	U	219	0	0	0	0	0	4	0	0	80	20	0	0	0	43.7	0.05	16.2	4	49.1	21.4	Absence	0
757	Northern Grassland 1	G	Rabbit	0	B	669	95	20	0	0	115	1	0	0	0	0	0	2	0	38	0.18	9.1	0.1	45.3	19.8	Absence	0
758	Northern Grassland 1	G	Rabbit	0	B	668	90	0	0	0	90	1	0	0	5	0	0	4	0	24.6	0.05	10.3	0.1	45.3	19.8	Absence	0
759	Northern Grassland 1	G	Rabbit	0	B	670	90	11	0	0	101	1	0	0	2	0	2	2	0	37.3	0.08	10.8	0.1	45.3	19.8	Absence	0
760	Northern Grassland 1	G	Rabbit	0	B	669	94	12	0	0	106	1	0	0	0	0	0	2	0	16	0.06	11.7	0.1	45.3	19.8	Absence	0
761	Northern Grassland 1	G	Rabbit	0	B	669	92	5	8	0	97	1	0	0	0	0	0	3	0	9.3	0	12.6	0.1	45.3	19.8	Absence	0
762	Northern Grassland 1	G	Rabbit	0	B	669	98	5	0	0	103	1	0	0	0	0	0	1	0	27.2	0.09	13.1	0.1	45.3	19.8	Absence	0
763	Northern Grassland 2	G	Rabbit	0	U	667	100	3	0	0	103	1	0	0	0	0	0	1	0	13.9	0.04	14.2	0.1	44.9	19.9	Absence	0
764	Northern Grassland 2	G	Rabbit	0	U	667	100	3	0	0	103	1	0	0	0	0	0	1	0	11.8	0.02	15	0.1	44.9	19.9	Absence	0
765	Northern Grassland 2	G	Rabbit	0	U	667	100	2	0	0	102	1	0	0	0	0	0	2	0	27.6	0.04	15.4	0.1	44.9	19.9	Absence	0
766	Northern Grassland 2	G	Rabbit	0	U	671	97	2	0	0	99	1	0	0	3	0	0	0	0	23.2	0.03	15.5	0.1	44.9	19.9	Absence	0
767	Northern Grassland 2	G	Rabbit	0	U	672	96	11	0	0	107	2	0	0	0	0	0	5	0	16.6	0.02	15.9	0.1	44.9	19.9	Absence	0
768	Northern Grassland 2	G	Rabbit	0	U	669	97	3	0	0	100	1	0	0	2	0	0	2	0	11.3	0.05	19.4	0.1	44.9	19.9	Absence	0
769	Grassland Hill 1	G	Rabbit	0	B	686	46	50	0	2	96	2	0	0	0	0	4	40	0	14.4	0.03	9.8	1.5	53.9	19.8	Absence	0
770	Grassland Hill 1	G	Rabbit	0	B	686	45	14	2	2	59	2	0	0	0	0	0	51	0	22.1	0.06	11.6	1.5	53.9	19.8	Absence	0
771	Grassland Hill 1	G	Rabbit	0	B	689	75	2	5	0	77	2	0	0	0	1	0	24	0	10.3	0.09	16	1.5	53.9	19.8	Absence	0
772	Grassland Hill 1	G	Rabbit	0	B	693	89	1	0	0	90	2	0	0	0	0	0	11	0	21.5	0.02	18.2	1.5	53.9	19.8	Absence	0
773	Grassland Hill 1	G	Rabbit	0	B	692	33	51	0	4	84	2	0	0	0	0	0	12	0	18.2	0.03	19.5	1.5	53.9	19.8	Absence	0
774	Grassland Hill 1	G	Rabbit	0	B	693	98	1	0	1	99	2	0	0	0	0	0	0	2	11.5	0.03	19	1.5	53.9	19.8	Absence	0
775	Grassland Hill 2	G	Rabbit	0	U	641	96	78	2	0	174	1	0	0	0	0	0	0	0	19.9	0.04	18.2	1.5	43.8	20.1	Absence	0
776	Grassland Hill 2	G	Rabbit	0	U	640	96	2	1	0	98	1	0	0	0	0	0	2	0	32.3	0.08	18.1	1.5	43.8	20.1	Absence	0
777	Grassland Hill 2	G	Rabbit	0	U	640	64	2	15	0	66	1	0	0	0	0	0	18	3	21.2	0.05	18.2	1.5	43.8	20.1	Absence	0
778	Grassland Hill 2	G	Rabbit	0	U	638	88	2	0	0	90	1	0	0	0	0	0	12	0	17.8	0.06	19.2	1.5	43.8	20.1	Absence	0
779	Grassland Hill 2	G	Rabbit	0	U	636	100	1	0	0	101	1	0	0	0	0	0	3	0	17.6	0.06	19	1.5	43.8	20.1	Absence	0
780	Grassland Hill 2	G	Rabbit	0	U	639	83	5	2	0	88	2	0	0	0	0	0	10	0	16.3	0.04	18.8	1.5	43.8	20.1	Absence	0
805	RRiverRoad 3	WE	Rabbit	0	B	378	0	5	3	2	5	3	20	30	0	15	0	60	30	15.9	0.05	10.3	2.1	54.9	21.6	Absence	0
806	RRiverRoad 3	WE	Rabbit	0	B	377	0	3	15	2	3	2	10	50	0	0	0	35	35	11.8	0	10.3	2.1	54.9	21.6	Absence	0
807	RRiverRoad 3	WE	Rabbit	0	B	385	0	2	0	0	2	2	60	35	1	0	0	10	50	9.4	0.05	10.5	2.1	54.9	21.6	Absence	0
808	RRiverRoad 3	WE	Rabbit	0	B	386	0	1	3	0	1	2	0	70	0	0	0	10	90	34.9	0.05	10.4	2.1	54.9	21.6	Absence	0
809	RRiverRoad 3	WE	Rabbit	0	B	381	0	1	0	0	1	2	0	70	0	1	0	50	60	22.1	0.09	10.6	2.1	54.9	21.6	Absence	0
810	RRiverRoad 3	WE	Rabbit	0	B	383	0	0	0	0	0	2	0	90	0	0	0	5	100	21	0.09	10.6	2.1	54.9	21.6	Absence	0
811	RRiverRoad 2	WE	Rabbit	0	U	384	0	0	0	5	0	2	0	65	1	0	0	3	95	8.9	0	14.6	2.1	56.1	21.5	Absence	0
812	RRiverRoad 2	WE	Rabbit	0	U	383	0	2	2	3	2	2	0	90	0	0	0	20	75	11.5	0.05	13.6	2.1	56.1	21.5	Absence	0
813	RRiverRoad 2	WE	Rabbit	0	U	383	0	0	0	70	0	1	0	45	0	0	0	75	50	18.9	0.06	13.1	2.1	56.1	21.5	Absence	0
814	RRiverRoad 2	WE	Rabbit	0	U	379	0	0	3	8	0	2	70	90	1	0	0	60	20	16.6	0.15	12.7	2.1	56.1	21.5	Absence	0
815	RRiverRoad 2	WE	Rabbit	0	U	379	0	0	0	3	0	2	0	75	0	0	0	60	70	10.4	0.04	11.8	2.1	56.1	21.5	Absence	0
816	RRiverRoad 2	WE	Rabbit	0	U	380	0	0	0	0	0	2	0	95	0	0	0	2	98	22.2	0.01	11	2.1	56.1	21.5	Absence	0
817	Hartz 2	WE	Rabbit	0	B	303	0	2	0	0	2	2	22	30	2	7	6	75	55	19.3	0.11	8.6	3	51.2	21.7	Absence	0
818	Hartz 2	WE	Rabbit	0	B	284	0	1	6	0	1	2	18	20	1	1	0	26	55	21.2	0.03	9.2	3	51.2	21.7	Absence	0
819	Hartz 2	WE	Rabbit	0	B	285	0	1	9	4	1	2	0	45	0	0	0	5	11	17.4	0	9.4	3	51.2	21.7	Absence	0
820	Hartz 2	WE	Rabbit	0	B	283	0	0	0	1	0	3	3	55	2	0	1	78	94	30.7	0.08	10	3	51.2	21.7	Absence	0
821	Hartz 2	WE	Rabbit	0	B	290	0	3	0	0	3	2	40	45	0	0	0	23	40	6.9	0	10.4	3	51.2	21.7	Absence	0
822	Hartz 2	WE	Rabbit	0	B	287	0	5	6	5	5	3	14	50	1	1	0	28	40	16.2	0.05	10.5	3	51.2	21.7	Absence	0
823	Hartz 1	WE	Rabbit	0	U	313	0	0	0	0	0	3	3	80	0	0	2	3	96	24.4	0.03	9.6	3	53	21.7	Absence	0
824	Hartz 1	WE	Rabbit	0	U	310	0	0	0	0	0	3	15	70	0	2	0	65	82	35.7	0.09	9.3	3	53	21.7	Absence	0
825	Hartz 1	WE	Rabbit	0	U	311	0	0	0	0	0	2	6	80	0	0	0	9	100	10.6	0.06	9.1	3	53	21.7	Absence	0
826	Hartz 1	WE	Rabbit	0	U	311	0	0	0	0	0	2	23	70	0	4	0	25	80	28.1	0.06	8.6	3	53	21.7	Absence	0
827	Hartz 1	WE	Rabbit	0	U	306	0	0	0	0	0	2	5	65	0	0	0	2	100	26.1	0.03	8.5	3	53	21.7	Absence	0
828	Hartz 1	WE	Rabbit	0	U	303	0	0	6	0	0	3	18	40	0	0	0	25	76	33.8	0.05	8.7	3	53	21.7	Absence	0
829	Hartz 4	WE	Rabbit	0	B	166	0	1	0	0	1	3	0	50	0	3	8	12	90	7.1	0.1	10.6	3.4	57.7	22.2	Absence	0
830	Hartz 4	WE	Rabbit	0	B	162	0	1	4	1	1	3	55	60	0	0	2	4	35	3.9	0.03	10.7	3.4	57.7	22.2	Absence	0
831	Hartz 4	WE	Rabbit	0	B	159	0	0	5	0	0	4	22	50	0	1	1	38	40	2.2	0.02	10.9	3.4	57.7	22.2	Absence	0
832	Hartz 4	WE	Rabbit	0	B	158	0	0	24	9	0	3	12	45	0	0	0	26	55	12.5	0.01	11.1	3.4	57.7	22.2	Absence	0
833	Hartz 4	WE	Rabbit	0	B	157	0	0	2	0	0	3	3	50	0	0	0	3	94	3.7	0.04	11.1	3.4	57.7	22.2	Absence	0
834	Hartz 4	WE	Rabbit	0	B	157	0	1	3	0	1	2	3	40	0	0	0	34	75	12.4	0.02	11.2	3.4	57.7	22.2	Absence	0
835	Hartz 3	WE	Rabbit	0	U	275	0	0	16	1	0	2	3	40	0	2	0	81	45	6.9	0	11.7	3.4	62.5	20.8	Absence	0
836	Hartz 3	WE	Rabbit	0	U	308	0	1	3	3	1	2	0	60	0	0	0	8	97	22.6	0.02	11.8	3.4	62.5	20.8	Absence	0
837	Hartz 3	WE	Rabbit	0	U	300	0	0	3	9	0	3	9	60	0	0	0	17	81	5.5	0	11.6	3.4	62.5	20.8	Absence	0
838	Hartz 3	WE	Rabbit	0	U	303	0	0	2	55	0	4	0	70	0	0	0	4	60	14.2	0	11.3	3.4	62.5	20.8	Absence	0
839	Hartz 3	WE	Rabbit	0	U	316	0	0	0	0	0	3	0	50	100	0	0	0	0	15	0.03	11	3.4	62.5	20.8	Absence	0
840	Hartz 3	WE	Rabbit	0	U	317	0	3	0	2	3	3	0	30	0	0	8	6	87	45.3	0.13	10.8	3.4	62.5	20.8	Absence	0
841	Fingal 3	WE	Rabbit	0	B	813	0	5	2	15	5	2	0	40	0	6	0	2	85	14.6	0.01	12.4	1.3	82.5	19.3	Absence	0
842	Fingal 3	WE	Rabbit	0	B	809	0	20	0	95	20	2	0	40	0	2	2	2	25	36.3	0.04	12.5	1.3	82.5	19.3	Absence	0
843	Fingal 3	WE	Rabbit	0	B	807	2	3	0	10	5	3	0	10	0	5	0	0	86	14.1	0.02	12.7	1.3	82.5	19.3	Absence	0
844	Fingal 3	WE	Rabbit	0	B	815	1	1	0	95	2	3	5	0	0	2	0	20	0	5.1	0.02	13.1	1.3	82.5	19.3	Absence	0
845	Fingal 3	WE	Rabbit	0	B	814	0	4	0	35	4	3	60	40	0	2	0	2	5	17.8	0	13.3	1.3	82.5	19.3	Absence	0
846	Fingal 3	WE	Rabbit	0	B	815	0	35	0	85	35	2	0	30	0	2	0	6	5	12.9	0	13.2	1.3	82.5	19.3	Absence	0
847	Fingal 4	WE	Rabbit	0	U	802	1	4	0	3	5	2	5	45	0	0	0	1	97	15.6	0	13.7	1.3	82.5	19.3	Absence	0
848	Fingal 4	WE	Rabbit	0	U	801	0	8	10	0	8	2	40	60	0	0	2	20	50	18.1	0	13.6	1.3	82.6	19.3	Absence	0
849	Fingal 4	WE	Rabbit	0	U	800	0	0	0	0	0	2	2	65	0	0	94	0	4	36.3	0.08	12.8	1.3	82.6	19.3	Absence	0
850	Fingal 4	WE	Rabbit	0	U	799	0	0	0	0	0	2	0	60	0	0	70	0	30	31.3	0.06	12.9	1.3	82.6	19.3	Absence	0
851	Fingal 4	WE	Rabbit	0	U	794	0	3	0	1	3	2	5	50	0	0	5	3	97	19.2	0.06	12.8	1.3	82.6	19.3	Absence	0
852	Fingal 4	WE	Rabbit	0	U	792	0	4	0	0	4	2	2	45	0	0	7	0	96	11.3	0.04	12.8	1.3	82.6	19.3	Absence	0
853	Musselroe 1	SHC	Rabbit	0	B	6	2	3	9	0	5	2	0	0	65	21	0	1	0	10.5	0	14	5.1	37.7	22.2	Absence	0
854	Musselroe 1	SHC	Rabbit	0	B	3	0	6	12	0	6	2	0	0	85	0	0	0	0	19.2	0.01	14.4	5.1	37.7	22.2	Absence	0
855	Musselroe 1	SHC	Rabbit	0	B	2	0	12	10	0	12	2	0	0	78	2	0	1	0	23.2	0.04	16.5	5.1	37.7	22.2	Absence	0
856	Musselroe 1	SHC	Rabbit	0	B	0	0	1	18	0	1	2	0	0	71	10	0	0	0	4.3	0	18.8	5.1	37.7	22.2	Absence	0
857	Musselroe 1	SHC	Rabbit	0	B	1	0	2	30	0	2	2	0	0	70	0	0	0	0	14.6	0.02	19.5	5.1	37.7	22.2	Absence	0
858	Musselroe 1	SHC	Rabbit	0	B	0	0	1	4	0	1	2	40	0	75	12	0	2	0	8.6	0.06	20.1	5.1	37.7	22.2	Absence	0
859	Musselroe 2	SHC	Rabbit	0	U	3	0	4	0	0	4	2	0	0	84	12	0	2	0	19.6	0.01	21.7	5.1	37.3	22.3	Absence	0
860	Musselroe 2	SHC	Rabbit	0	U	5	0	2	0	0	2	2	0	0	95	4	0	2	0	16.9	0.01	21.5	5.1	37.3	22.3	Absence	0
861	Musselroe 2	SHC	Rabbit	0	U	6	0	4	0	0	4	2	0	0	70	30	0	0	0	17.6	0.03	21.3	5.1	37.3	22.3	Absence	0
862	Musselroe 2	SHC	Rabbit	0	U	5	0	12	1	0	12	2	0	0	80	6	0	1	0	17.6	0	21.4	5.1	37.3	22.3	Absence	0
863	Musselroe 2	SHC	Rabbit	0	U	5	0	5	0	0	5	2	0	0	65	30	0	1	0	17.7	0.01	21.6	5.1	37.3	22.3	Absence	0
864	Musselroe 2	SHC	Rabbit	0	U	5	12	1	1	0	13	2	2	0	84	10	0	2	0	17.3	0	21.6	5.1	37.3	22.3	Absence	0
865	Akaroa 1	SHC	Rabbit	0	B	21	0	2	20	0	2	1	0	0	80	2	0	0	10	6.2	0.02	13.1	5.5	50.3	21.7	Absence	0
870	Akaroa 1	SHC	Rabbit	0	B	23	0	2	30	0	2	2	6	0	30	0	0	1	40	2.9	0	14.9	5.5	50.3	21.7	Absence	0
871	Akaroa 2	SHC	Rabbit	0	U	19	0	10	2	0	10	1	0	0	30	55	5	1	0	4.3	0	15.6	5.5	50.6	21.7	Absence	0
872	Akaroa 2	SHC	Rabbit	0	U	18	0	4	1	0	4	2	0	0	10	65	0	0	20	9.3	0.02	15.8	5.5	50.6	21.7	Absence	0
874	Akaroa 2	SHC	Rabbit	0	U	15	0	5	20	0	5	2	25	0	25	25	20	3	15	3.4	0	16.1	5.5	50.6	21.7	Absence	0
875	Akaroa 2	SHC	Rabbit	0	U	15	0	0	1	0	0	2	0	0	5	65	20	1	15	3	0	16.3	5.5	50.6	21.7	Absence	0
876	Akaroa 2	SHC	Rabbit	0	U	13	0	2	5	0	2	2	0	0	10	10	60	3	40	9.9	0.08	16.5	5.5	50.6	21.8	Absence	0
877	Ida Bay 1	SHC	Rabbit	0	B	14	80	2	2	0	82	2	4	0	2	15	0	0	10	29.6	0.02	13.4	4.4	56.7	21.8	Absence	0
878	Ida Bay 1	SHC	Rabbit	0	B	14	10	0	2	0	10	2	10	0	0	25	65	1	0	30	0.16	13.4	4.4	56.7	21.8	Absence	0
879	Ida Bay 1	SHC	Rabbit	0	B	15	35	2	0	0	37	2	8	0	0	15	45	2	0	39.6	0.06	13.6	4.4	56.7	21.8	Absence	0
880	Ida Bay 1	SHC	Rabbit	0	B	17	55	2	0	0	57	2	4	0	2	45	5	0	0	36.3	0.06	14.2	4.4	56.7	21.8	Absence	0
881	Ida Bay 1	SHC	Rabbit	0	B	13	35	2	2	0	37	2	20	0	0	45	10	0	0	45.3	0.08	14.8	4.4	56.7	21.8	Absence	0
882	Ida Bay 1	SHC	Rabbit	0	B	15	60	2	0	0	62	2	0	0	0	15	15	0	5	32.7	0.11	15.1	4.4	56.7	21.8	Absence	0
883	Ida Bay 2	SHC	Rabbit	0	U	9	15	1	0	10	16	2	0	0	10	0	30	5	45	22.6	0	15.3	4.4	56.7	21.8	Absence	0
884	Ida Bay 2	SHC	Rabbit	0	U	9	0	0	0	0	0	2	0	0	100	0	0	0	0	62.2	0.18	15.2	4.4	57.3	21.8	Absence	0
885	Ida Bay 2	SHC	Rabbit	0	U	10	20	0	0	0	20	2	8	0	0	50	0	0	60	27.4	0	14.9	4.4	57.3	21.8	Absence	0
886	Ida Bay 2	SHC	Rabbit	0	U	14	0	0	0	0	0	2	0	0	100	0	0	0	0	53.2	0.14	15	4.4	57.3	21.8	Absence	0
887	Ida Bay 2	SHC	Rabbit	0	U	14	0	0	0	0	0	2	0	0	100	0	0	0	0	40.7	0.09	14.2	4.4	57.3	21.8	Absence	0
888	Ida Bay 2	SHC	Rabbit	0	U	12	0	2	0	0	2	2	0	0	10	0	0	10	80	38.4	0.07	14.4	4.4	57.3	21.8	Absence	0
889	Zeehan Coastal 1	SHC	Rabbit	0	B	207	0	1	15	0	1	2	0	0	75	10	0	4	0	38.9	0.01	16.8	3.5	50.3	21.3	Absence	0
890	Zeehan Coastal 1	SHC	Rabbit	0	B	210	0	0	10	0	0	2	0	0	85	5	0	3	0	39	0.07	16.1	3.5	50.3	21.3	Absence	0
891	Zeehan Coastal 1	SHC	Rabbit	0	B	213	0	0	15	0	0	2	0	0	80	1	0	10	0	48.3	0.03	15.9	3.5	50.3	21.3	Absence	0
892	Zeehan Coastal 1	SHC	Rabbit	0	B	214	0	1	5	0	1	2	0	0	95	0	0	0	0	43.3	0	14.9	3.5	50.3	21.3	Absence	0
893	Zeehan Coastal 1	SHC	Rabbit	0	B	212	0	1	1	0	1	2	0	0	98	2	0	8	0	44.7	0.02	14.8	3.5	50.3	21.3	Absence	0
894	Zeehan Coastal 1	SHC	Rabbit	0	B	213	0	2	40	0	2	2	0	0	60	0	0	1	0	37.9	0.03	15	3.5	50.3	21.3	Absence	0
895	Zeehan Coastal 2	SHC	Rabbit	0	U	231	0	2	0	0	2	2	0	0	98	2	0	1	10	47.6	0	19.5	3.5	52.3	20.9	Absence	0
896	Zeehan Coastal 2	SHC	Rabbit	0	U	232	0	0	0	0	0	2	0	0	80	8	0	0	12	47.1	0.02	19.3	3.5	52.3	20.9	Absence	0
897	Zeehan Coastal 2	SHC	Rabbit	0	U	236	0	0	0	0	0	2	0	0	40	55	0	0	15	41.9	0.09	18.8	3.5	52.3	20.9	Absence	0
898	Zeehan Coastal 2	SHC	Rabbit	0	U	240	0	0	0	0	0	2	0	0	85	15	0	0	0	55	0	18.3	3.5	52.3	20.9	Absence	0
899	Zeehan Coastal 2	SHC	Rabbit	0	U	241	0	0	0	0	0	2	0	0	95	5	0	0	5	42.3	0.07	18	3.5	52.3	20.9	Absence	0
900	Zeehan Coastal 2	SHC	Rabbit	0	U	243	0	0	0	0	0	2	0	0	55	45	0	0	0	47.8	0.09	17.7	3.5	52.3	20.9	Absence	0
618	Five Rivers 2	DE	Rabbit	1	B	828	5	10	10	60	15	2	0	10	0	0	0	0	40	16.7	0	14.2	-0.2	49.9	19.3	Presence	1
652	Five Rivers 3	H	Rabbit	1	B	814	4	70	0	0	74	1	0	0	0	0	0	12	8	27.7	0.02	13.6	-0.4	50.7	19.4	Presence	1
680	Lake Augusta 2	H	Rabbit	1	U	1163	39	0	3	57	39	2	0	0	0	1	0	0	0	24.6	0.06	12	-1.7	53	18.4	Presence	1
686	Liaweenee 1	H	Rabbit	1	B	1065	5	6	87	15	11	1	0	0	0	0	0	2	0	15.7	0.02	8.8	-1.5	47.1	18.5	Presence	1
696	Liaweenee 2	H	Rabbit	1	U	1064	24	5	63	63	29	1	0	0	0	0	0	5	3	22.2	0.04	4.8	-1.5	46.3	18.6	Presence	1
711	Little Pine Moorland 1	MSR	Rabbit	1	B	1014	57	31	12	0	88	2	0	0	0	0	0	0	0	21.5	0.03	17.3	-1.5	49	18.6	Presence	1
742	Mt Zeehan 2	MSR	Rabbit	1	U	182	0	2	20	4	2	4	0	0	30	2	50	40	10	22.2	0.12	15.4	2.6	75.9	22.2	Presence	1
866	Akaroa 1	SHC	Rabbit	1	B	23	0	4	40	0	4	1	0	0	60	0	0	0	15	11	0	13.3	5.5	50.3	21.7	Presence	1
873	Akaroa 2	SHC	Rabbit	1	U	16	5	2	2	0	7	2	0	0	25	50	20	2	40	7	0	16	5.5	50.6	21.7	Presence	1
653	Five Rivers 3	H	Rabbit	2	B	812	8	70	0	0	78	1	0	0	0	0	0	20	2	16.8	0.05	13.6	-0.4	50.7	19.4	Presence	1
666	Little Pine Lagoon 1	H	Rabbit	2	B	1011	8	7	25	0	15	1	4	0	0	0	0	56	0	20.6	0	12	-1.3	46.2	18.7	Presence	1
674	Lake Augusta 1	H	Rabbit	2	B	1140	5	15	26	0	20	1	7	0	0	0	0	46	1	44.6	0.06	9.1	-1.7	53.4	18.3	Presence	1
675	Lake Augusta 1	H	Rabbit	2	B	1149	25	11	4	0	36	1	0	0	0	4	0	55	0	32.2	0.02	9.1	-1.7	53.4	18.3	Presence	1
687	Liaweenee 1	H	Rabbit	2	B	1066	74	9	16	8	83	1	2	0	0	0	0	5	0	11	0.02	8.5	-1.5	47.1	18.5	Presence	1
714	Little Pine Moorland 1	MSR	Rabbit	2	B	1012	21	33	46	0	54	1	0	0	0	0	0	0	0	12.4	0.04	13.1	-1.5	49	18.6	Presence	1
734	Mt Zeehan 1	MSR	Rabbit	2	B	186	30	0	40	15	30	3	0	0	0	2	0	25	0	47.5	0.2	9.5	2.6	74.6	22	Presence	1
869	Akaroa 1	SHC	Rabbit	2	B	23	0	2	70	0	2	2	0	0	35	0	0	0	2	4	0.02	14.5	5.5	50.3	21.7	Presence	1
662	Little Pine Lagoon 1	H	Rabbit	3	B	1011	14	8	31	1	22	1	0	0	0	2	0	60	0	12.1	0	12.2	-1.3	46.2	18.7	Presence	1
663	Little Pine Lagoon 1	H	Rabbit	3	B	1011	15	15	20	3	30	1	4	0	2	0	0	41	0	19.5	0.04	12.7	-1.3	46.2	18.7	Presence	1
651	Five Rivers 3	H	Rabbit	4	B	815	8	80	0	0	88	1	0	0	0	6	0	10	4	9.7	0.06	13.7	-0.4	50.7	19.4	Presence	1
673	Lake Augusta 1	H	Rabbit	4	B	1152	0	13	5	0	13	2	8	0	0	0	0	63	0	22.9	0.02	10.4	-1.7	53.4	18.3	Presence	1
679	Lake Augusta 2	H	Rabbit	4	U	1167	29	0	2	20	29	2	0	0	0	10	0	39	0	22.8	0.06	11.5	-1.7	53	18.4	Presence	1
665	Little Pine Lagoon 1	H	Rabbit	5	B	1013	26	4	20	0	30	1	2	0	0	0	0	44	0	24.3	0.04	12.6	-1.3	46.2	18.7	Presence	1
737	Mt Zeehan 1	MSR	Rabbit	6	B	192	20	0	45	10	20	4	0	0	20	5	0	4	0	35.3	0.14	12.3	2.6	74.6	22	Presence	1
868	Akaroa 1	SHC	Rabbit	6	B	25	0	2	80	0	2	2	1	0	15	2	0	0	15	8.2	0	14.2	5.5	50.3	21.7	Presence	1
613	Five Rivers 2	DE	Rabbit	15	B	814	5	80	8	0	85	2	0	0	0	16	0	10	2	23.2	0.05	15.8	-0.2	49.9	19.3	Presence	1
867	Akaroa 1	SHC	Rabbit	23	B	24	0	2	40	0	2	1	2	0	40	2	0	0	25	8.3	0.07	13.8	5.5	50.3	21.7	Presence	1
688	Liaweenee 1	H	Rabbit	26	B	1065	19	4	65	18	23	1	0	0	0	1	0	0	0	22.2	0.06	7.6	-1.5	47.1	18.5	Presence	1
617	Five Rivers 2	DE	Rabbit	56	B	827	10	30	35	20	40	2	0	0	0	0	0	5	2	14.8	0.04	15.6	-0.2	49.9	19.3	Presence	1

## Sheet: Wet
Number	Location	TASVEG	Herbivore	HerbivoreID	Scat	Time Since Fire Score	Fire	SoilM	Elevation	Grass	Herb	Bare	Rock	Fodder	Size	CWD	Slope	Sedge	Shrub	Fern	Moss	Litter	SoilC	SoilT	MARjuly	MARdec	MaxJuly	MaxDec	MinJuly	MinDec	MARfeb	Maxjan
205	RRiverRoad 3	WE	Macropod	1	3	2	B	15.9	378	0	5	3	2	5	2	20	3	0	15	0	60	30	0.05	10.3	54.7	57.9	9.9	19.5	2.1	7.2	54.9	21.6
206	RRiverRoad 3	WE	Macropod	1	0	2	B	11.8	377	0	3	15	2	3	2	10	2	0	0	0	35	35	0	10.3	54.7	57.9	9.9	19.5	2.1	7.2	54.9	21.6
207	RRiverRoad 3	WE	Macropod	1	0	2	B	9.4	385	0	2	0	0	2	2	60	2	1	0	0	10	50	0.05	10.5	54.7	57.9	9.9	19.5	2.1	7.2	54.9	21.6
208	RRiverRoad 3	WE	Macropod	1	0	2	B	34.9	386	0	1	3	0	1	2	0	2	0	0	0	10	90	0.05	10.4	54.7	57.9	9.9	19.5	2.1	7.2	54.9	21.6
209	RRiverRoad 3	WE	Macropod	1	0	2	B	22.1	381	0	1	0	0	1	2	0	2	0	1	0	50	60	0.09	10.6	54.7	57.9	9.9	19.5	2.1	7.2	54.9	21.6
210	RRiverRoad 3	WE	Macropod	1	0	2	B	21	383	0		0	0	0	2	0	2	0	0	0	5	100	0.09	10.6	54.7	57.9	9.9	19.5	2.1	7.2	54.9	21.6
211	RRiverRoad 2	WE	Macropod	1	0	0	U	8.9	384	0	0	0	5	0	0	0	2	1	0	0	3	95	0	14.6	54.7	57.9	9.9	19.5	2.1	7.2	56.1	21.5
212	RRiverRoad 2	WE	Macropod	1	0	0	U	11.5	383	0	2	2	3	2	0	0	2	0	0	0	20	75	0.05	13.6	54.7	57.9	9.9	19.5	2.1	7.2	56.1	21.5
213	RRiverRoad 2	WE	Macropod	1	0	0	U	18.9	383	0	0	0	70	0	0	0	1	0	0	0	75	50	0.06	13.1	54.7	57.9	9.9	19.5	2.1	7.2	56.1	21.5
214	RRiverRoad 2	WE	Macropod	1	0	0	U	16.6	379	0	0	3	8	0	0	70	2	1	0	0	60	20	0.15	12.7	54.7	57.9	9.9	19.5	2.1	7.2	56.1	21.5
215	RRiverRoad 2	WE	Macropod	1	0	0	U	10.4	379	0	0	0	3	0	0	0	2	0	0	0	60	70	0.04	11.8	54.7	57.9	9.9	19.5	2.1	7.2	56.1	21.5
216	RRiverRoad 2	WE	Macropod	1	0	0	U	22.2	380	0	0	0	0	0	0	0	2	0	0	0	2	98	0.01	11	54.7	57.9	9.9	19.5	2.1	7.2	56.1	21.5
217	Hartz 2	WE	Macropod	1	0	2	B	19.3	303	0	2	0	0	2	2	22	2	2	7	6	75	55	0.11	8.6	88.9	62.5	10.5	19.7	3	8.5	51.2	21.7
218	Hartz 2	WE	Macropod	1	0	2	B	21.2	284	0	1	6	0	1	2	18	2	1	1	0	26	55	0.03	9.2	88.9	62.5	10.5	19.7	3	8.5	51.2	21.7
219	Hartz 2	WE	Macropod	1	0	2	B	17.4	285	0	1	9	4	1	2	0	2	0	0	0	5	11	0	9.4	88.9	62.5	10.5	19.7	3	8.5	51.2	21.7
220	Hartz 2	WE	Macropod	1	0	2	B	30.7	283	0	0	0	1	0	2	3	3	2	0	1	78	94	0.08	10	88.9	62.5	10.5	19.7	3	8.5	51.2	21.7
221	Hartz 2	WE	Macropod	1	0	2	B	6.9	290	0	3	0	0	3	2	40	2	0	0	0	23	40	0	10.4	88.9	62.5	10.5	19.7	3	8.5	51.2	21.7
222	Hartz 2	WE	Macropod	1	0	2	B	16.2	287	0	5	6	5	5	2	14	3	1	1	0	28	40	0.05	10.5	88.9	62.5	10.5	19.7	3	8.5	51.2	21.7
223	Hartz 1	WE	Macropod	1	0	0	U	24.4	313	0	0	0	0	0	0	3	3	0	0	2	3	96	0.03	9.6	88.9	62.5	10.5	19.7	3	8.5	53	21.7
224	Hartz 1	WE	Macropod	1	0	0	U	35.7	310	0	0	0	0	0	0	15	3	0	2	0	65	82	0.09	9.3	88.9	62.5	10.5	19.7	3	8.5	53	21.7
225	Hartz 1	WE	Macropod	1	0	0	U	10.6	311	0	0	0	0	0	0	6	2	0	0	0	9	100	0.06	9.1	88.9	62.5	10.5	19.7	3	8.5	53	21.7
226	Hartz 1	WE	Macropod	1	0	0	U	28.1	311	0	0	0	0	0	0	23	2	0	4	0	25	80	0.06	8.6	88.9	62.5	10.5	19.7	3	8.5	53	21.7
227	Hartz 1	WE	Macropod	1	0	0	U	26.1	306	0	0	0	0	0	0	5	2	0	0	0	2	100	0.03	8.5	88.9	62.5	10.5	19.7	3	8.5	53	21.7
228	Hartz 1	WE	Macropod	1	0	0	U	33.8	303	0	0	6	0	0	0	18	3	0	0	0	25	76	0.05	8.7	88.9	62.5	10.5	19.7	3	8.5	53	21.7
229	Hartz 4	WE	Macropod	1	0	2	B	7.1	166	0	1	0	0	1	2	0	3	0	3	8	12	90	0.1	10.6	52.2	54.2	10.4	19.2	3.4	8.7	57.7	22.2
230	Hartz 4	WE	Macropod	1	0	2	B	3.9	162	0	1	4	1	1	2	55	3	0	0	2	4	35	0.03	10.7	52.2	54.2	10.4	19.2	3.4	8.7	57.7	22.2
231	Hartz 4	WE	Macropod	1	0	2	B	2.2	159	0	0	5	0	0	2	22	4	0	1	1	38	40	0.02	10.9	52.2	54.2	10.4	19.2	3.4	8.7	57.7	22.2
232	Hartz 4	WE	Macropod	1	0	2	B	12.5	158	0	0	24	9	0	2	12	3	0	0	0	26	55	0.01	11.1	52.2	54.2	10.4	19.2	3.4	8.7	57.7	22.2
233	Hartz 4	WE	Macropod	1	0	2	B	3.7	157	0	0	2	0	0	2	3	3	0	0	0	3	94	0.04	11.1	52.2	54.2	10.4	19.2	3.4	8.7	57.7	22.2
234	Hartz 4	WE	Macropod	1	0	2	B	12.4	157	0	1	3	0	1	2	3	2	0	0	0	34	75	0.02	11.2	52.2	54.2	10.4	19.2	3.4	8.7	57.7	22.2
235	Hartz 3	WE	Macropod	1	0	0	U	6.9	275	0	0	16	1	0	0	3	2	0	2	0	81	45	0	11.7	52.2	54.2	10.4	19.2	3.4	8.7	62.5	20.8
236	Hartz 3	WE	Macropod	1	0	0	U	22.6	308	0	1	3	3	1	0	0	2	0	0	0	8	97	0.02	11.8	52.2	54.2	10.4	19.2	3.4	8.7	62.5	20.8
237	Hartz 3	WE	Macropod	1	0	0	U	5.5	300	0	0	3	9	0	0	9	3	0	0	0	17	81	0	11.6	52.2	54.2	10.4	19.2	3.4	8.7	62.5	20.8
238	Hartz 3	WE	Macropod	1	0	0	U	14.2	303	0	0	2	55	0	0	0	4	0	0	0	4	60	0	11.3	52.2	54.2	10.4	19.2	3.4	8.7	62.5	20.8
239	Hartz 3	WE	Macropod	1	0	0	U	15	316	0	0	0	0	0	0	0	3	100	0	0	0	0	0.03	11	52.2	54.2	10.4	19.2	3.4	8.7	62.5	20.8
240	Hartz 3	WE	Macropod	1	0	0	U	45.3	317	0	3	0	2	3	0	0	3	0	0	8	6	87	0.13	10.8	52.2	54.2	10.4	19.2	3.4	8.7	62.5	20.8
241	Fingal 3	WE	Macropod	1	3	1	B	14.6	813	0	5	2	15	5	2	0	2	0	6	0	2	85	0.01	12.4	149.9	93.8	7.4	17.1	1.3	6.3	82.5	19.3
242	Fingal 3	WE	Macropod	1	0	1	B	36.3	809	0	20	0	95	20	2	0	2	0	2	2	2	25	0.04	12.5	149.9	93.8	7.4	17.1	1.3	6.3	82.5	19.3
243	Fingal 3	WE	Macropod	1	7	1	B	14.1	807	2	3	0	10	5	2	0	3	0	5	0	0	86	0.02	12.7	149.9	93.8	7.4	17.1	1.3	6.3	82.5	19.3
244	Fingal 3	WE	Macropod	1	0	1	B	5.1	815	1	1	0	95	2	2	5	3	0	2	0	20	0	0.02	13.1	149.9	93.8	7.4	17.1	1.3	6.3	82.5	19.3
245	Fingal 3	WE	Macropod	1	0	1	B	17.8	814	0	4	0	35	4	2	60	3	0	2	0	2	5	0	13.3	149.9	93.8	7.4	17.1	1.3	6.3	82.5	19.3
246	Fingal 3	WE	Macropod	1	0	1	B	12.9	815	0	35	0	85	35	2	0	2	0	2	0	6	5	0	13.2	149.9	93.8	7.4	17.1	1.3	6.3	82.5	19.3
247	Fingal 4	WE	Macropod	1	0	0	U	15.6	802	1	4	0	3	5	0	5	2	0	0	0	1	97	0	13.7	149.9	93.8	7.4	17.1	1.3	6.3	82.5	19.3
248	Fingal 4	WE	Macropod	1	4	0	U	18.1	801	0	8	10	0	8	0	40	2	0	0	2	20	50	0	13.6	149.9	93.8	7.4	17.1	1.3	6.3	82.6	19.3
249	Fingal 4	WE	Macropod	1	0	0	U	36.3	800	0	0	0	0	0	0	2	2	0	0	94	0	4	0.08	12.8	149.9	93.8	7.4	17.1	1.3	6.3	82.6	19.3
250	Fingal 4	WE	Macropod	1	0	0	U	31.3	799	0	0	0	0	0	0	0	2	0	0	70	0	30	0.06	12.9	149.9	93.8	7.4	17.1	1.3	6.3	82.6	19.3
251	Fingal 4	WE	Macropod	1	0	0	U	19.2	794	0	3	0	1	3	0	5	2	0	0	5	3	97	0.06	12.8	149.9	93.8	7.4	17.1	1.3	6.3	82.6	19.3
252	Fingal 4	WE	Macropod	1	0	0	U	11.3	792	0	4	0	0	4	0	2	2	0	0	7	0	96	0.04	12.8	149.9	93.8	7.4	17.1	1.3	6.3	82.6	19.3

## Sheet: High
Number	Location	TASVEG	Herbivore	HerbivoreID	Scat	Time Since Fire Score	Fire	SoilM	Elevation	Grass	Herb	Bare	Rock	Fodder	Size	CWD	Slope	Sedge	Shrub	Fern	Moss	Litter	SoilC	SoilT	MARjuly	MARdec	MaxJuly	MaxDec	MinJuly	MinDec	MARfeb	Maxjan
49	Five Rivers 3	H	Macropod	1	17	2	B	27.2	815	35	2	30	6	37	2	2	1	0	0	0	2	38	0.05	12.7	100	64.1	6.7	17	-0.4	4.9	50.7	19.4
50	Five Rivers 3	H	Macropod	1	37	2	B	23.5	815	40	30	0	25	70	2	0	1	0	0	0	2	25	0.07	12.8	100	64.1	6.7	17	-0.4	4.9	50.7	19.4
51	Five Rivers 3	H	Macropod	1	42	2	B	9.7	815	8	80	0	0	88	2	0	1	0	6	0	10	4	0.06	13.7	100	64.1	6.7	17	-0.4	4.9	50.7	19.4
52	Five Rivers 3	H	Macropod	1	26	2	B	27.7	814	4	70	0	0	74	2	0	1	0	0	0	12	8	0.02	13.6	100	64.1	6.7	17	-0.4	4.9	50.7	19.4
53	Five Rivers 3	H	Macropod	1	54	2	B	16.8	812	8	70	0	0	78	2	0	1	0	0	0	20	2	0.05	13.6	100	64.1	6.7	17	-0.4	4.9	50.7	19.4
54	Five Rivers 3	H	Macropod	1	27	2	B	13.2	812	5	80	0	0	85	2	0	1	0	0	0	15	3	0	13.7	100	64.1	6.7	17	-0.4	4.9	50.7	19.4
55	Five Rivers 4	H	Macropod	1	25	0	U	8.7	815	80	3	0	0	83	0	0	1	0	0	0	17	0	0	13	100	64.1	6.7	17	-0.4	4.9	50.8	19.5
56	Five Rivers 4	H	Macropod	1	12	0	U	7.1	817	92	8	0	0	100	0	0	1	0	0	0	0	0	0.07	13	100	64.1	6.7	17	-0.4	4.9	50.8	19.5
57	Five Rivers 4	H	Macropod	1	13	0	U	8.3	817	17	20	1	2	37	0	0	1	0	60	0	1	0	0.08	14.2	100	64.1	6.7	17	-0.4	4.9	50.8	19.5
58	Five Rivers 4	H	Macropod	1	12	0	U	11.2	817	6	6	0	0	12	0	0	1	0	88	0	0	0	0.03	14.2	100	64.1	6.7	17	-0.4	4.9	50.8	19.5
59	Five Rivers 4	H	Macropod	1	5	0	U	8.9	818	40	5	0	45	45	0	0	1	0	0	0	10	20	0.02	14.2	100	64.1	6.7	17	-0.4	4.9	50.8	19.5
60	Five Rivers 4	H	Macropod	1	28	0	U	5.3	820	55	15	1	0	70	0	0	2	3	8	0	3	20	0.01	14.2	100	64.1	6.7	17	-0.4	4.9	50.8	19.5
61	Little Pine Lagoon 1	H	Macropod	1	14	2	B	32.9	1014	62	3	17	0	65	2	0	1	0	0	0	18	0	0.07	11.7	125.8	70	5.2	16.3	-1.3	4	46.2	18.7
62	Little Pine Lagoon 1	H	Macropod	1	10	2	B	12.1	1011	14	8	31	1	22	2	0	1	0	2	0	60	0	0	12.2	125.8	70	5.2	16.3	-1.3	4	46.2	18.7
63	Little Pine Lagoon 1	H	Macropod	1	15	2	B	19.5	1011	15	15	20	3	30	2	4	1	2	0	0	41	0	0.04	12.7	125.8	70	5.2	16.3	-1.3	4	46.2	18.7
64	Little Pine Lagoon 1	H	Macropod	1	6	2	B	20.7	1012	3	22	18	6	25	2	7	1	0	0	0	60	0	0.05	12.5	125.8	70	5.2	16.3	-1.3	4	46.2	18.7
65	Little Pine Lagoon 1	H	Macropod	1	7	2	B	24.3	1013	26	4	20	0	30	2	2	1	0	0	0	44	0	0.04	12.6	125.8	70	5.2	16.3	-1.3	4	46.2	18.7
66	Little Pine Lagoon 1	H	Macropod	1	10	2	B	20.6	1011	8	7	25	0	15	2	4	1	0	0	0	56	0	0	12	125.8	70	5.2	16.3	-1.3	4	46.2	18.7
67	Little Pine Lagoon 2	H	Macropod	1	7	0	U	30.4	1014	9	2	0	0	11	0	0	1	0	83	0	6	0	0.04	13.7	125.8	70	5.2	16.3	-1.3	4	46.3	18.7
68	Little Pine Lagoon 2	H	Macropod	1	7	0	U	29.5	1015	36	21	8	0	57	0	0	1	0	26	0	9	0	0.05	13.2	125.8	70	5.2	16.3	-1.3	4	46.3	18.7
69	Little Pine Lagoon 2	H	Macropod	1	5	0	U	19.2	1014	16	2	0	0	18	0	0	1	0	79	0	3	0	0.06	13.2	125.8	70	5.2	16.3	-1.3	4	46.3	18.7
70	Little Pine Lagoon 2	H	Macropod	1	1	0	U	17.4	1016	1	1	0	0	2	0	0	1	0	97	0	1	0	0.05	14.3	125.8	70	5.2	16.3	-1.3	4	46.3	18.7
71	Little Pine Lagoon 2	H	Macropod	1	0	0	U	21.8	1020	0	2	0	0	2	0	0	1	0	90	0	6	2	0	15.2	125.8	70	5.2	16.3	-1.3	4	46.3	18.7
72	Little Pine Lagoon 2	H	Macropod	1	0	0	U	11.3	1021	0	0	0	0	0	0	0	1	0	100	0	0	0	0.04	15.2	125.8	70	5.2	16.3	-1.3	4	46.3	18.7
73	Lake Augusta 1	H	Macropod	1	21	2	B	22.9	1152	0	13	5	0	13	2	8	2	0	0	0	63	0	0.02	10.4	96.1	58.8	4.8	16	-1.7	3.1	53.4	18.3
74	Lake Augusta 1	H	Macropod	1	24	2	B	44.6	1140	5	15	26	0	20	2	7	1	0	0	0	46	1	0.06	9.1	96.1	58.8	4.8	16	-1.7	3.1	53.4	18.3
75	Lake Augusta 1	H	Macropod	1	53	2	B	32.2	1149	25	11	4	0	36	2	0	1	0	4	0	55	0	0.02	9.1	96.1	58.8	4.8	16	-1.7	3.1	53.4	18.3
76	Lake Augusta 1	H	Macropod	1	46	2	B	10.7	1148	46	48	0	0	94	2	0	1	0	6	0	0	0	0.05	6.4	96.1	58.8	4.8	16	-1.7	3.1	53.4	18.3
77	Lake Augusta 1	H	Macropod	1	38	2	B	44.7	1147	16	7	0	0	23	2	48	1	0	0	0	27	0	0.08	9.5	96.1	58.8	4.8	16	-1.7	3.1	53.4	18.3
78	Lake Augusta 1	H	Macropod	1	18	2	B	48.6	1149	4	4	7	0	8	2	6	1	0	0	0	79	0	0.04	9.5	96.1	58.8	4.8	16	-1.7	3.1	53.4	18.3
79	Lake Augusta 2	H	Macropod	1	7	0	U	22.8	1167	29	0	2	20	29	0	0	2	0	10	0	39	0	0.06	11.5	96.1	58.8	4.8	16	-1.7	3.1	53	18.4
80	Lake Augusta 2	H	Macropod	1	11	0	U	24.6	1163	39	0	3	57	39	0	0	2	0	1	0	0	0	0.06	12	96.1	58.8	4.8	16	-1.7	3.1	53	18.4
81	Lake Augusta 2	H	Macropod	1	30	0	U	15.8	1160	38	0	14	47	38	0	0	1	0	0	0	1	0	0.02	12.1	96.1	58.8	4.8	16	-1.7	3.1	53	18.4
82	Lake Augusta 2	H	Macropod	1	1	0	U	5.7	1161	0	0	3	97	0	0	0	1	0	0	0	0	0	0.02	11.4	96.1	58.8	4.8	16	-1.7	3.1	53	18.4
83	Lake Augusta 2	H	Macropod	1	1	0	U	15.1	1162	5	0	23	71	5	0	0	2	0	0	0	1	0	0.02	11.4	96.1	58.8	4.8	16	-1.7	3.1	53	18.4
84	Lake Augusta 2	H	Macropod	1	10	0	U	24.2	1164	0	8	25	12	8	0	0	2	0	52	0	3	0	0.06	11.3	96.1	58.8	4.8	16	-1.7	3.1	53	18.4
85	Liaweenee 1	H	Macropod	1	3	2	B	18.2	1061	57	17	21	3	74	2	0	1	0	0	0	2	0	0.03	10.8	111.5	58.2	5.3	16.2	-1.5	3.9	47.1	18.5
86	Liaweenee 1	H	Macropod	1	3	2	B	15.7	1065	5	6	87	15	11	2	0	1	0	0	0	2	0	0.02	8.8	111.5	58.2	5.3	16.2	-1.5	3.9	47.1	18.5
87	Liaweenee 1	H	Macropod	1	3	2	B	11	1066	74	9	16	8	83	2	2	1	0	0	0	5	0	0.02	8.5	111.5	58.2	5.3	16.2	-1.5	3.9	47.1	18.5
88	Liaweenee 1	H	Macropod	1	4	2	B	22.2	1065	19	4	65	18	23	2	0	1	0	1	0	0	0	0.06	7.6	111.5	58.2	5.3	16.2	-1.5	3.9	47.1	18.5
89	Liaweenee 1	H	Macropod	1	1	2	B	18.1	1068	4	12	55	45	16	2	0	1	0	0	0	3	0	0.04	6.9	111.5	58.2	5.3	16.2	-1.5	3.9	47.1	18.5
90	Liaweenee 1	H	Macropod	1	0	2	B	26	1067	0	3	90	90	3	2	0	1	0	0	0	0	0	0.05	6.3	111.5	58.2	5.3	16.2	-1.5	3.9	47.1	18.5
91	Liaweenee 2	H	Macropod	1	0	0	U	14.2	1064	14	5	0	0	19	0	0	1	0	75	0	6	0	0.05	5.7	111.5	58.2	5.3	16.2	-1.5	3.9	46.3	18.6
92	Liaweenee 2	H	Macropod	1	0	0	U	25	1066	62	4	8	5	66	0	0	1	0	0	0	21	0	0.06	5.6	111.5	58.2	5.3	16.2	-1.5	3.9	46.3	18.6
93	Liaweenee 2	H	Macropod	1	5	0	U	31.5	1065	7	2	88	78	9	0	0	1	0	0	0	2	2	0.05	5.3	111.5	58.2	5.3	16.2	-1.5	3.9	46.3	18.6
94	Liaweenee 2	H	Macropod	1	1	0	U	17.7	1065	27	6	0	0	33	0	0	1	0	0	0	73	0	0.06	5.3	111.5	58.2	5.3	16.2	-1.5	3.9	46.3	18.6
95	Liaweenee 2	H	Macropod	1	4	0	U	12.3	1065	4	6	0	0	10	0	0	1	0	52	0	48	0	0.06	5	111.5	58.2	5.3	16.2	-1.5	3.9	46.3	18.6
96	Liaweenee 2	H	Macropod	1	12	0	U	22.2	1064	24	5	63	63	29	0	0	1	0	0	0	5	3	0.04	4.8	111.5	58.2	5.3	16.2	-1.5	3.9	46.3	18.6
97	Lake Augusta 3	H	Macropod	1	75	2	B	53.2	1149	2	1	1	0	3	2	0	1	0	0	0	97	0	0.04	15.9	125.8	70	4.8	16	-1.7	3.1	53.7	18.3
98	Lake Augusta 3	H	Macropod	1	17	2	B	58.9	1149	5	2	1	0	7	2	0	1	0	0	0	92	0	0.08	16.9	125.8	70	4.8	16	-1.7	3.1	53.7	18.3
99	Lake Augusta 3	H	Macropod	1	48	2	B	65.8	1149	17	38	21	0	55	2	2	1	0	0	0	22	0	0.05	17	125.8	70	4.8	16	-1.7	3.1	53.7	18.3
100	Lake Augusta 3	H	Macropod	1	17	2	B	70.1	1148	6	58	9	0	64	2	8	1	0	0	0	22	0	0.18	19.9	125.8	70	4.8	16	-1.7	3.1	53.7	18.3
101	Lake Augusta 3	H	Macropod	1	28	2	B	67.1	1147	7	54	4	0	61	2	11	1	0	0	0	24	0	0.08	18.8	125.8	70	4.8	16	-1.7	3.1	53.7	18.3
102	Lake Augusta 3	H	Macropod	1	40	2	B	56.6	1147	28	90	0	0	118	2	0	1	0	6	0	22	0	0.03	18.2	125.8	70	4.8	16	-1.7	3.1	53.7	18.3
103	Lake Augusta 4	H	Macropod	1	21	0	U	49.9	1147	91	0	0	0	91	0	0	1	0	9	0	15	0	0.02	17.1	125.8	70	4.8	16	-1.7	3.1	53.8	18.3
104	Lake Augusta 4	H	Macropod	1	10	0	U	68.9	1150	12	18	6	0	30	0	0	1	40	18	0	16	0	0.06	17.5	125.8	70	4.8	16	-1.7	3.1	53.8	18.3
105	Lake Augusta 4	H	Macropod	1	18	0	U	68.9	1150	4	16	0	0	20	0	0	1	18	64	0	1	0	0.07	16.6	125.8	70	4.8	16	-1.7	3.1	53.8	18.3
106	Lake Augusta 4	H	Macropod	1	19	0	U	19.9	1150	5	8	0	0	13	0	0	1	2	85	0	0	0	0.02	16.3	125.8	70	4.8	16	-1.7	3.1	53.8	18.3
107	Lake Augusta 4	H	Macropod	1	14	0	U	64.2	1150	7	8	9	0	15	0	0	1	0	75	0	1	0	0.04	16.3	125.8	70	4.8	16	-1.7	3.1	53.8	18.3
108	Lake Augusta 4	H	Macropod	1	14	0	U	64.2	1150	7	8	9	0	15	0	0	1	0	75	0	1	0	0.04	16.3	125.8	70	4.8	16	-1.7	3.1	53.8	18.3

## Sheet: Points
#	Location	Date	TASVEG	Co-ords
1	Sunny Hills 1	17.04	Dry Euc	497087 5235009
2	Sunny Hills 2	17.04	Dry Euc	497042 5234897
3	Five Rivers 2	19.04	Dry Euc	458880 5344013
4	Five Rivers 1	19.04	Dry Euc	459748 5342077
5	Euc Home 1	3.05	Dry Euc	456887 5324133
6	Euc Home 2	4.05	Dry Euc	455548 5324407
7	Fingal 1	14.06	Dry Euc	585291 5390947
8	Fingal 2	14.06	Dry Euc	585164 5391178
9	Five Rivers 3	19.04	Highland and treeless vegetation	585151 5391225
10	Five Rivers 4	19.04	Highland and treeless vegetation	459155 5344139
11	Little Pine Lagoon 1	25.04	Highland and treeless vegetation	467443 5349571
12	Little Pine Lagoon 2	25.04	Highland and treeless vegetation	467541 5349549
13	Lake Augusta 1	25.04	Highland and treeless vegetation	467500 5349520
14	Lake Augusta 2	25.04	Highland and treeless vegetation	467500 5349520
15	Liaweenee 1	4.05	Highland and treeless vegetation	473681 5361894
16	Liaweenee 2	4.05	Highland and treeless vegetation	473775 5361841
17	Lake Augusta 3	5.05	Highland and treeless vegetation	465098 5366737
18	Lake Augusta 4	5.05	Highland and treeless vegetation	465001 5366812
19	Little Pine Moorland 1	4.05	Moorland, sedgeland and rushland	468060 5350351
20	Little Pine Moorland 2	4.05	Moorland, sedgeland and rushland	468025 5350318
21	Queensberry Track 1	20.06	Moorland, sedgeland and rushland	364621 5350178
22	Queensberry Track 2	20.06	Moorland, sedgeland and rushland	364621 5350231
23	Mt Zeehan 1	21.06	Moorland, sedgeland and rushland	362677 5358083
24	Mt Zeehan 2	21.06	Moorland, sedgeland and rushland	362613 5358134
25	Zeehan 3	21.06	Moorland, sedgeland and rushland	360164 5364996
26	Zeehan 4	21.06	Moorland, sedgeland and rushland	360270 5364314
27	Northern Grassland 1	5.05	Grassland	457043 5326779
28	Northern Grassland 2	5.05	Grassland	457206 5327016
29	Grassland Hill 1	4.05	Grassland	456235 5325354
30	Grassland Hill 2	4.05	Grassland	456151 5324484
31	Beaufront 1	7.07	Grassland	546708 5345422
32	Beaufront 2	7.07	Grassland	546733 5345358
33	Beaufront 3	7.07	Grassland	546475 5345423
34	Beaufront 4	7.07	Grassland	546486 5345380
35	RRiverRoad 3	9.04	Wet Euc	488465 5216928
36	RRiverRoad 2	9.04	Wet Euc	488395 5216817
37	Hartz 2	21.04	Wet Euc	483096 5220582
38	Hartz 1	21.04	Wet Euc	482942 5220011
39	Hartz 4	21.04	Wet Euc	482804 5224683
40	Hartz 3	21.04	Wet Euc	481431 5227311
41	Fingal 3	14.06	Wet Euc	589910 5387195
42	Fingal 4	14.06	Wet Euc	590012 5387122
43	Musselroe 1	13.06	Scrub, heathland and coastal complexes	599978 5479117
44	Musselroe 2	13.06	Scrub, heathland and coastal complexes	599855 5478468
45	Akaroa 1	14.06	Scrub, heathland and coastal complexes	610768 5426705
46	Akaroa 2	14.06	Scrub, heathland and coastal complexes	610631 5426735
47	Ida Bay 1	18.06	Scrub, heathland and coastal complexes	493924 5189657
48	Ida Bay 2	18.06	Scrub, heathland and coastal complexes	493904 5189570
49	Zeehan Coastal 1	21.06	Scrub, heathland and coastal complexes	359756 5365395
50	Zeehan Coastal 2	21.06	Scrub, heathland and coastal complexes	360520 5363273

## Sheet: Sheet1
Location	Date	TASVEG	Easting	Northing
Sunny Hills 1	17.04	Dry Forest	497087	5235009
Five Rivers 2	19.04	Dry Forest	458880	5344013
Euc Home 1	3.05	Dry Forest	456887	5324133
Fingal 1	14.06	Dry Forest	585291	5390947
Five Rivers 3	19.04	Highland	585151	5391225
Little Pine Lagoon 1	25.04	Highland	467443	5349571
Lake Augusta 1	25.04	Highland	467500	5349520
Liaweenee 1	4.05	Highland	473681	5361894
Lake Augusta 3	5.05	Highland	465098	5366737
Little Pine Moorland 1	4.05	Sedgeland	468060	5350351
Queensberry Track 1	20.06	Sedgeland	364621	5350178
Mt Zeehan 1	21.06	Sedgeland	362677	5358083
Zeehan 3	21.06	Sedgeland	360164	5364996
Northern Grassland 1	5.05	Grassland	457043	5326779
Grassland Hill 1	4.05	Grassland	456235	5325354
RRiverRoad 3	9.04	Wet Forest	488465	5216928
Hartz 2	21.04	Wet Forest	483096	5220582
Hartz 4	21.04	Wet Forest	482804	5224683
Fingal 3	14.06	Wet Forest	589910	5387195
Musselroe 1	13.06	Heath	599978	5479117
Akaroa 1	14.06	Heath	610768	5426705
Ida Bay 1	18.06	Heath	493924	5189657
Zeehan Coastal 1	21.06	Heath	359756	5365395
